# Supplementary material
Source: PubMed Central journal article supplement (PMC6637757)
Supplement: NIHMS1040823-supplement-Supplemental.pdf [file NIHMS1040823-supplement-Supplemental.pdf]

# EFFECTIVENESS OF NEURAMINIDASE INHIBITORS IN REDUCING MORTALITY IN HOSPITALISED INFLUENZA A(H1N1)pdm09 PATIENTS: AN INDIVIDUAL PATIENT DATA META-ANALYSIS

## Supplementary information

### Supplementary Appendix 1: PRIDE study Investigators

| Study no† | Authors                                                                                                                     | Author Affiliation                                                                                                                                                                                                                                                                                                                  |
|-----------|-----------------------------------------------------------------------------------------------------------------------------|-------------------------------------------------------------------------------------------------------------------------------------------------------------------------------------------------------------------------------------------------------------------------------------------------------------------------------------|
| 1         | YS Leo, WM Kyaw                                                                                                             | Department of Infectious Diseases, Tan Tock Seng Hospital, Singapore                                                                                                                                                                                                                                                                |
| 2         | A Al Mamun <sup>1</sup> , M Rahman <sup>2</sup> , E Azziz-Baumgartner <sup>3</sup>                                          | <sup>1</sup> International Centre for Diarrhoeal Diseases Research Bangladesh (ICDDR), Dhaka, Bangladesh<br><sup>2</sup> Institute of Epidemiology, Disease Control and Research (IEDCR), Dhaka, Bangladesh<br><sup>3</sup> Centers for Disease Control and Prevention, Atlanta, Georgia, USA                                       |
| 3         | A Moradi <sup>1,2</sup> , P Tabarsi <sup>2</sup>                                                                            | <sup>1</sup> The Division of Ocular Immunology, Department of Ophthalmology, Johns Hopkins University School of Medicine, Baltimore, Maryland, United States<br><sup>2</sup> National Research Institute for Tuberculosis and Lung Disease, Masih Daneshvari Hospital, Shahid Beheshti University of Medical Sciences, Tehran, Iran |
| 4         | A H Rodríguez* for the H1N1 Sociedad Española de Medicina Intensiva, Crítica y Unidades Coronarias (SEMICYUC) working group | *Hospital Joan XXIII, Critical Care Department - IISPV - URV - CIBERES, Tarragona, Spain                                                                                                                                                                                                                                            |
| 5         | E Bautista <sup>1</sup> , AL Higuera Iglesias <sup>2</sup>                                                                  | <sup>1</sup> Critical Care Department, Instituto Nacional de Enfermedades Respiratorias, Ismael Cosío Villegas, Mexico City, Mexico<br><sup>2</sup> Epidemiology Research Unit, Instituto Nacional de Enfermedades Respiratorias, Ismael Cosío Villegas, Mexico City, Mexico                                                        |
| 6         | AC Seale <sup>1,2</sup> , J Fraser <sup>1</sup>                                                                             | <sup>1</sup> Paediatric Intensive Care Unit, Bristol Children's Hospital, UK<br><sup>2</sup> Bristol Children's Vaccine Centre, School of Clinical Sciences, University of Bristol, Bristol, UK                                                                                                                                     |
| 7         | A van Zwol                                                                                                                  | Department of Pediatric Intensive Care, VU University Medical Center, Amsterdam, Netherlands                                                                                                                                                                                                                                        |
| 8         | KKC Chan, AMC Kwan                                                                                                          | Department of Intensive Care, Pamela Youde Nethersole Eastern Hospital, Chai Wan, Hong Kong                                                                                                                                                                                                                                         |
| 9         | A Mickiene, D Velyvyte                                                                                                      | Lithuanian University of Health Sciences, Kaunas, Lithuania                                                                                                                                                                                                                                                                         |
| 10        | B Bertisch, M Hoffmann                                                                                                      | Division of Infectious Diseases and Hospital Epidemiology, Kantonsspital St. Gallen, Switzerland                                                                                                                                                                                                                                    |

| Study no† | Authors                                                                                                                                 | Author Affiliation                                                                                                                                                                                                           |
|-----------|-----------------------------------------------------------------------------------------------------------------------------------------|------------------------------------------------------------------------------------------------------------------------------------------------------------------------------------------------------------------------------|
| 11        | B A Rath <sup>1</sup> , B Schweiger <sup>2</sup>                                                                                        | <sup>1</sup> Department of Pediatrics, Division of Pneumonology-Immunology, Charité University Medical Center, Berlin, Germany<br><sup>2</sup> National Reference Centre Influenza at Robert Koch Institute, Berlin, Germany |
| 12        | B Cao, X Li                                                                                                                             | Beijing Chao-Yang Hospital, Capital Medical University, Beijing, China                                                                                                                                                       |
| 13        | B Du, X Hu                                                                                                                              | Peking Union Medical College Hospital, Beijing, China                                                                                                                                                                        |
| 14        | B Sertogullarindan, B Ozbay                                                                                                             | Yuzuncu Yil University Medical Faculty, Department of Pulmonary Medicine Van, Turkey                                                                                                                                         |
| 15        | C Bantar, ME Oliva                                                                                                                      | Dept. of Infection Control, Hospital San Martín de Paraná, Entre Ríos, Argentina                                                                                                                                             |
| 16        | A Torres, C Cilloniz                                                                                                                    | Hospital Clinic, University of Barcelona IDIBAPS, CIBERES, Spain                                                                                                                                                             |
| 17        | S Dashti-Khavidaki, H Khalili                                                                                                           | Department of Clinical Pharmacy, Faculty of Pharmacy, Tehran University of Medical Sciences, Tehran, Iran                                                                                                                    |
| 18        | D Tran                                                                                                                                  | Division of Infectious Diseases, Department of Paediatrics, The Hospital for Sick Children University of Toronto, Canada                                                                                                     |
| 19        | E Langenegger                                                                                                                           | Department of Obstetrics and Gynaecology, Stellenbosch University and Tygerberg, South Africa                                                                                                                                |
| 20        | EB Sarrouf <sup>1</sup> , MR Cuezco <sup>1</sup> , E Azziz-Baumgartner <sup>2</sup>                                                     | <sup>1</sup> Ministerio de Salud de Tucumán, Argentina<br><sup>2</sup> Centers for Disease Control and Prevention, Atlanta, Georgia, USA                                                                                     |
| 21        | E Talarek, M Marczynska                                                                                                                 | Department of Children`s Infectious Diseases, Medical University of Warsaw, Poland                                                                                                                                           |
| 22        | F Madanat                                                                                                                               | King Hussein Cancer Center, Department of Pediatrics, Amman , Jordan                                                                                                                                                         |
| 23        | G Dubnov-Raz                                                                                                                            | The Edmond and Lily Safra Children's Hospital, Sheba Medical Center, Israel                                                                                                                                                  |
| 24        | G Keijzers, J Gerrard, D Macbeth                                                                                                        | Gold Coast Hospital, Gold Coast, Australia                                                                                                                                                                                   |
| 25        | G Metan, I Bozkurt                                                                                                                      | Department of Infectious diseases and clinical microbiology, Erciyes University Faculty of Medicine, Kayseri, Turkey                                                                                                         |
| 26        | I Lahlou Amine, H El Rhaffouli                                                                                                          | University Mohammed V-Souissi, Faculty of Medicine and Pharmacy, Mohammed V Military Teaching Hospital, Biosafety Level 3 and Research Laboratory, Rabat, Morocco                                                            |
| 27        | I Bonmarin                                                                                                                              | Institut de Veille Sanitaire, France                                                                                                                                                                                         |
| 28        | J Carratala*, D Viasus* for the Novel Influenza A (H1N1) Study Group of the Spanish Network for Research in Infectious Diseases (REIPI) | *Department of Infectious Diseases, Hospital Universitari de Bellvitge-IDIBELL, L'Hospitalet de Llobregat, REIPI, University of Barcelona, Barcelona, Spain                                                                  |

| Study no† | Authors                                                                                                                       | Author Affiliation                                                                                                                                                                                                                                                                                                                                                                                                                   |
|-----------|-------------------------------------------------------------------------------------------------------------------------------|--------------------------------------------------------------------------------------------------------------------------------------------------------------------------------------------------------------------------------------------------------------------------------------------------------------------------------------------------------------------------------------------------------------------------------------|
| 29        | JW Tang <sup>123</sup> , TP Loh <sup>1</sup> , ESC Koay <sup>14</sup>                                                         | <sup>1</sup> Molecular Diagnostic Centre, Department of Laboratory Medicine National University Hospital, Singapore<br><sup>2</sup> Alberta Provincial Laboratory for Public Health, University of Alberta Hospital, Canada<br><sup>3</sup> Department of Medical Microbiology and Immunology, University of Alberta, Edmonton, Alberta, Canada<br><sup>4</sup> Department of Pathology, National University of Singapore, Singapore |
| 30        | J Bettinger <sup>1</sup> , W Vaudry* (for the Canadian Immunization Monitoring Program, Active [IMPACT]), D Tran <sup>2</sup> | <sup>1</sup> Vaccine Evaluation Center, BC Children's Hospital and the University of British Columbia, Pediatrics, Vancouver, BC, Canada<br>* Division of Infectious Diseases, Department of Pediatrics, University of Alberta, Stollery Children's Hospital, Edmonton, Alberta, Canada<br><sup>2</sup> Division of Infectious Diseases, Department of Paediatrics, The Hospital for Sick Children University of Toronto, Canada     |
| 31        | JT Denholm                                                                                                                    | Victorian Infectious Diseases Service and Department of Microbiology and Immunology, at the Peter Doherty Institute for Infection and Immunity, Parkville, Australia.                                                                                                                                                                                                                                                                |
| 32        | KKW To, KY Yuen                                                                                                               | Carol Yu Centre for Infection and Div of Infectious Diseases, Dept of Microbiology, The University of Hong Kong, Queen Mary Hospital, Hong Kong                                                                                                                                                                                                                                                                                      |
| 33        | G Kuszniierz <sup>1</sup> , H Escobar <sup>2</sup> , E Azziz-Baumgartner <sup>3</sup>                                         | <sup>1</sup> National Institute of Respiratory Diseases "Emilio Coni" ANLIS "C. Malbran, Argentina<br><sup>2</sup> Ministry of Health of the province of Santa Fe, Argentina<br><sup>3</sup> Centers for Disease Control and Prevention, Atlanta, Georgia, USA                                                                                                                                                                       |
| 34        | C Báez <sup>1</sup> , L Moriconi <sup>1</sup> , E Azziz-Baumgartner <sup>2</sup>                                              | <sup>1</sup> Ministerio de Salud de la Provincia de Buenos Aires, Argentina<br><sup>2</sup> Centers for Disease Control and Prevention, Atlanta, Georgia, USA                                                                                                                                                                                                                                                                        |
| 35        | M Giannella, E Bouza                                                                                                          | Department of Clinical Microbiology and Infectious Diseases, Hospital General Universitario Gregorio Marañón, Madrid, Spain                                                                                                                                                                                                                                                                                                          |
| 36        | M Echavarría, DN Marcone                                                                                                      | Clinical Virology Laboratory, CEMIC University Hospital, Galvan 4102, (1431) Buenos Aires, Argentina                                                                                                                                                                                                                                                                                                                                 |
| 37        | M Knight* for the UK Obstetric Surveillance System (UKOSS)                                                                    | * National Perinatal Epidemiology Unit, Nuffield Department of Population Health, University of Oxford, UK                                                                                                                                                                                                                                                                                                                           |
| 38        | M Bassetti                                                                                                                    | Santa Maria Misericordia Hospital, Udine Italy                                                                                                                                                                                                                                                                                                                                                                                       |

| Study no† | Authors                                          | Author Affiliation                                                                                                                                                                                                                                                  |
|-----------|--------------------------------------------------|---------------------------------------------------------------------------------------------------------------------------------------------------------------------------------------------------------------------------------------------------------------------|
| 39        | M Ozkan                                          | Dr. Sami Ulus Research and Training Hospital of Women's and Children's Health and Diseases, Clinic of Pediatric Neurology, Ankara, Turkey                                                                                                                           |
| 40        | M Paul <sup>1</sup> , L Leibovici <sup>2</sup>   | <sup>1</sup> Division of Infectious Diseases, Rambam Health Care Campus, Haifa, Israel<br><sup>2</sup> Medicine E, Rabin Medical Center, Beilinson Hospital, Petah Tikva, Israel                                                                                    |
| 41        | MF Jiménez, FP Mastalir                          | Departamento de Ginecologia e Obstetrícia - UFCSPA, Preceptora da Residência Médica do Hospital Fêmina, Brazil                                                                                                                                                      |
| 42        | P Gérardin                                       | <sup>1</sup> NICU/PICU, PFME, CHU Saint Pierre -<br><sup>2</sup> CIC 1410 (CHU/Inserm/ University of La Réunion/URML-OI), CHU Saint Pierre -<br><sup>3</sup> UMR PIMIT (CHU/Inserm/University of La Réunion/IRD/ CNRS), CYROI, Saint Denis - Reunion island, France |
| 43        | E Maltezos, P Zarogoulidis                       | Unit of Infectious Diseases, University General Hospital of Alexandroupolis, Democritus University Thrace, Dragana, Greece                                                                                                                                          |
| 44        | PAD Duarte                                       | Universidade Estadual do Oeste do Paraná - UNIOESTE - Cascavel (PR), Brazil                                                                                                                                                                                         |
| 45        | RTC Yokota <sup>1</sup> , WN Araújo <sup>2</sup> | <sup>1</sup> Departamento de Vigilância Epidemiológica, Secretaria de Vigilância em Saúde, Ministério da Saúde, Brasília DF, Brazil<br><sup>2</sup> University of Brasília, Brazil                                                                                  |
| 46        | R Linko* for the FINNH1N1-study group            | *Helsinki University Hospital, Helsinki, Finland                                                                                                                                                                                                                    |
| 47        | A Kandeel, S Refaey                              | Ministry of Health in Egypt, Cairo, Egypt                                                                                                                                                                                                                           |
| 48        | SR Dominguez                                     | Department of Pediatric Infectious Diseases, Children's Hospital Colorado, University of Colorado School of Medicine, Aurora, Colorado, USA                                                                                                                         |
| 49        | SH Törün, A Somer                                | Department of Pediatric Infectious Diseases, Istanbul University Istanbul Medical Faculty, Istanbul, Turkey                                                                                                                                                         |
| 50        | ST Fanella, G Poliquin                           | Section of Pediatric Infectious Diseases, University of Manitoba, Winnipeg, Manitoba, Canada                                                                                                                                                                        |
| 51        | S Gubbels                                        | Department of Infectious Disease Epidemiology, Sector for National Health Documentation and Research, Statens Serum Institut, Copenhagen, Denmark                                                                                                                   |
| 52        | TSA Al Khuwaitir, MM Barhoush                    | Department of Medicine, King Saud Medical City, Riyadh, Kingdom of Saudi Arabia                                                                                                                                                                                     |
| 53        | TML Souza, ML Aguiar-Oliveira, MM Siqueira       | Laboratory of Respiratory Viruses, Oswaldo Cruz Institute/Fiocruz, Rio de Janeiro, Brazil                                                                                                                                                                           |
| 54        | T Vidmar                                         | General Hospital Slovenj Gradec, Slovenia                                                                                                                                                                                                                           |
| 55        | K Kudo <sup>1</sup> , T Manabe <sup>2</sup>      | <sup>1</sup> National Center for Global Health and Medicine, Tokyo Japan<br><sup>2</sup> Graduate School of Public Health, Teikyo                                                                                                                                   |

| Study no† | Authors                                                                                                                                                               | Author Affiliation                                                                                                                                                                                                                                                                                                                                                                                                                    |
|-----------|-----------------------------------------------------------------------------------------------------------------------------------------------------------------------|---------------------------------------------------------------------------------------------------------------------------------------------------------------------------------------------------------------------------------------------------------------------------------------------------------------------------------------------------------------------------------------------------------------------------------------|
|           |                                                                                                                                                                       | University, Tokyo, Japan                                                                                                                                                                                                                                                                                                                                                                                                              |
| 56        | AP Anovadiya, CB Tripathi                                                                                                                                             | Department of Pharmacology, Government Medical College and Sir Takhtsinhji General Hospital, Bhavnagar, Gujarat, India                                                                                                                                                                                                                                                                                                                |
| 57        | VH Borja-Aburto, A Rascon-Pacheco                                                                                                                                     | Instituto Mexicano del Seguro Social (IMSS), Mexico                                                                                                                                                                                                                                                                                                                                                                                   |
| 58        | P Liu, W Cui                                                                                                                                                          | Department of Infectious Diseases, the First Affiliated Hospital, China Medical University, Shenyang, China                                                                                                                                                                                                                                                                                                                           |
| 59        | E Čeljuska-Tošev, I Kuzman                                                                                                                                            | University Hospital for Infectious Diseases, University of Zagreb, School of Medicine, Zagreb, Croatia                                                                                                                                                                                                                                                                                                                                |
| 60        | JS Nguyen Van-Tam* for the Influenza Clinical Information Network (FLU-CIN)                                                                                           | *Division of Epidemiology and Public Health, University of Nottingham, Nottingham, UK                                                                                                                                                                                                                                                                                                                                                 |
| 61        | J Skreć-Magierło <sup>1</sup> , A Florek-Michalska <sup>2</sup>                                                                                                       | <sup>1</sup> Uniwersytet Rzeszowski, Poland<br><sup>2</sup> Kliniczny Oddział Ginekologii i Poloznictwa, WSS Rzeszow, Poland                                                                                                                                                                                                                                                                                                          |
| 62        | B Beovic, B Pecavar                                                                                                                                                   | Department of Infectious Diseases, University Medical Centre, Ljubljana, Slovenia                                                                                                                                                                                                                                                                                                                                                     |
| 63        | D Mikic, M Kojic                                                                                                                                                      | Military Medical Academy, Clinic for Infectious and Tropical Diseases, Serbia.                                                                                                                                                                                                                                                                                                                                                        |
| 64        | FG Smith, D Parekh                                                                                                                                                    | Perioperative, Critical Care and Trauma Trials Group, School of Clinical and Experimental Medicine, University of Birmingham, UK                                                                                                                                                                                                                                                                                                      |
| 65        | FP Polack <sup>1,2</sup> , R Libster <sup>1,2</sup>                                                                                                                   | <sup>1</sup> Vanderbilt Vaccine Center, Department of Pediatrics, Vanderbilt University, Nashville, TN, USA<br><sup>2</sup> Fundacion INFANT, Buenos Aires, Argentina                                                                                                                                                                                                                                                                 |
| 66        | Z Gao <sup>1</sup> , J Bao <sup>1</sup> , Y Chen <sup>2</sup> , H Li <sup>2</sup> , Q Yu <sup>3</sup> , J Hu <sup>3</sup> , W Zhang <sup>4</sup> , W Zuo <sup>4</sup> | <sup>1</sup> Department of Respiratory & Critical Care Medicine, Peking University People's Hospital, Beijing, China<br><sup>2</sup> Respiratory Department of Fujian Provincial Hospital, Fujian, China<br><sup>3</sup> Respiratory Department of The First Affiliated Hospital of Lanzhou University, Lanzhou, China<br><sup>4</sup> Respiratory Department of The First Affiliated Hospital of Nanchang University, Jiangxi, China |
| 67        | H Burgmann, W Poeppel                                                                                                                                                 | Medical University of Vienna, Austria                                                                                                                                                                                                                                                                                                                                                                                                 |
| 68        | KB Lankarani, B Honarvar<br>M Moghadami                                                                                                                               | Health Policy Research Center, Shiraz University of Medical Sciences, Shiraz, Iran<br>HIV/AIDS Research Center, Shiraz University of Medical Sciences, Shiraz, Iran                                                                                                                                                                                                                                                                   |
| 69        | P Nymadawa, T Chinbayar                                                                                                                                               | National Influenza Center, National Center of Communicable Diseases, Ministry of Health, Ulaanbaatar, Mongolia                                                                                                                                                                                                                                                                                                                        |
| 70        | PH Hoyer, C Kemen, S Götberg                                                                                                                                          | Cath. Children's Hospital Wilhelmstift, Liliencronstr, Hamburg, Germany                                                                                                                                                                                                                                                                                                                                                               |

| Study no† | Authors                                                                                              | Author Affiliation                                                                                                                                                                                                                                                                                                                   |
|-----------|------------------------------------------------------------------------------------------------------|--------------------------------------------------------------------------------------------------------------------------------------------------------------------------------------------------------------------------------------------------------------------------------------------------------------------------------------|
| 71        | R Booy, G Khandaker                                                                                  | National Centre for Immunisation Research and Surveillance (NCIRS), The Children's Hospital at Westmead, University of Sydney, New South Wales, Australia                                                                                                                                                                            |
| 72        | Z Memish, M al Masri                                                                                 | Ministry of Health, Riyadh, Kingdom of Saudi Arabia                                                                                                                                                                                                                                                                                  |
| 73        | QT Islam, A Basher, R Amin                                                                           | Dhaka Medical College Hospital, Bangladesh                                                                                                                                                                                                                                                                                           |
| 74        | TM Uyeki* for the National Heart, Lung Blood Institute, ARDSNET Clinical Trials (NHLBI ARDS) Network | *Influenza Division, National Center for Immunization and Respiratory Diseases, Centers for Disease Control and Prevention, Atlanta, USA                                                                                                                                                                                             |
| 75        | TM Uyeki* for the Pediatric Acute Lung Injury and Sepsis Investigator's (PALISI) Network             | *Influenza Division, National Center for Immunization and Respiratory Diseases, Centers for Disease Control and Prevention, Atlanta, USA                                                                                                                                                                                             |
| 76        | J Herberg, S Gormley                                                                                 | Section of Paediatrics, Division of Infectious Disease, Imperial College, London, UK                                                                                                                                                                                                                                                 |
| 77        | A McGeer                                                                                             | Toronto Invasive Bacterial Diseases Network, Toronto, Canada                                                                                                                                                                                                                                                                         |
| 78        | KGI Mohn <sup>1,2</sup> , RJ Cox <sup>1,2</sup>                                                      | <sup>1</sup> Section for Infectious Diseases, Medical Department, and Department of Research and Development, Haukeland University Hospital<br><sup>2</sup> The Influenza Centre, Department of Clinical Science, University of Bergen, Norway<br><sup>3</sup> Department of Research and Development, Haukeland University Hospital |
| ‡         | E Mayo-Montero, E Ballester-Orcal                                                                    | Instituto de Medicina Preventiva de la Defensa, Capitan Medico Ramon y Cajal (IMPDEF). Ministerio de Defensa, Madrid, Spain                                                                                                                                                                                                          |
| ‡         | R Bingisser, F Stephan                                                                               | Department of Emergency Medicine, University Hospital Basel, Switzerland                                                                                                                                                                                                                                                             |

\*Named author

† Baseline characteristics of each constituent dataset are presented in Supplementary Appendix 7.

‡ Centres not included in the current analysis as they include only outpatient data.

## Supplementary Appendix 2: Minimum dataset requirement

| Data variables                                                                                                                                                     | Description/definition                                                                                                                                                                                                                                                                                                              |
|--------------------------------------------------------------------------------------------------------------------------------------------------------------------|-------------------------------------------------------------------------------------------------------------------------------------------------------------------------------------------------------------------------------------------------------------------------------------------------------------------------------------|
| <b>About the data</b>                                                                                                                                              |                                                                                                                                                                                                                                                                                                                                     |
| 1. Source of data                                                                                                                                                  | E.g. hospital or emergency department, community/ GP sentinel data, national surveillance data etc.                                                                                                                                                                                                                                 |
| 2. Patient identifier                                                                                                                                              | A unique identifier for each patient e.g. a specific number that corresponds to each patient                                                                                                                                                                                                                                        |
| <b>Patient characteristics</b>                                                                                                                                     |                                                                                                                                                                                                                                                                                                                                     |
| 1. Age                                                                                                                                                             | Date of birth/ age at hospital admission                                                                                                                                                                                                                                                                                            |
| 2. Sex                                                                                                                                                             | Male/ female                                                                                                                                                                                                                                                                                                                        |
| 3. Any other risk factors                                                                                                                                          | Such as obesity/ BMI, smoking status etc.                                                                                                                                                                                                                                                                                           |
| 4. Seasonal influenza vaccination status                                                                                                                           | Yes/no                                                                                                                                                                                                                                                                                                                              |
| <b>Clinical characteristics</b>                                                                                                                                    |                                                                                                                                                                                                                                                                                                                                     |
| 1. Underlying Co-morbidities<br>a) Asthma<br>b) COPD<br>c) Pneumonia<br>d) Other pulmonary diseases<br>e) Other chronic conditions                                 | List of underlying medical conditions for each individual patient                                                                                                                                                                                                                                                                   |
| 2. Pregnancy                                                                                                                                                       | Pregnancy/ fetal wellbeing assessments e.g. weeks of gestation including pregnancy outcome                                                                                                                                                                                                                                          |
| 3. Clinical examinations<br>a) Influenza presenting symptoms on hospital admission<br>b) Admission laboratory examinations performed<br>c) Chest x-ray examination | <ul style="list-style-type: none"> <li>- Date of symptoms onset</li> <li>- List of symptoms presenting at hospital admission</li> <li>- E.g. technique used for laboratory confirmation of influenza AH1N1 e.g. RT-PCR, viral culture, etc.</li> <li>- Date chest x-ray taken</li> <li>- Findings upon x-ray examination</li> </ul> |
| <b>Treatment characteristics</b>                                                                                                                                   |                                                                                                                                                                                                                                                                                                                                     |
| 1. In-hospital antiviral treatment (oseltamivir, zanamivir etc.)                                                                                                   | - Date of prescription/ treatment including name of antiviral agent (i.e. oseltamivir/ zanamivir), route of administration(e.g. inhaled, oral , IV), dosage and dose frequency, treatment duration                                                                                                                                  |
| 2. In-hospital antibiotics treatment                                                                                                                               | - List of names of administered antibiotics including route(e.g. inhaled, oral , IV), dose and dose frequency, duration and dates prescribed                                                                                                                                                                                        |
| 3. Other in-hospital additional treatment therapies e.g. corticosteroids, antipyretics etc.                                                                        | - List of names of other administered treatments including route(e.g. inhaled, oral , IV), dose and dose frequency, duration and dates prescribed                                                                                                                                                                                   |
| <b>Outcome</b> (please provide data on at least one of the outcome measures)                                                                                       |                                                                                                                                                                                                                                                                                                                                     |
| 1. Hospitalisation                                                                                                                                                 | <ul style="list-style-type: none"> <li>- Dates of admission and discharge</li> <li>- Primary admitting diagnosis for cases</li> </ul>                                                                                                                                                                                               |

| Data variables                                                   | Description/definition                                                                                                                                                                                                                                                                          |
|------------------------------------------------------------------|-------------------------------------------------------------------------------------------------------------------------------------------------------------------------------------------------------------------------------------------------------------------------------------------------|
|                                                                  | admitted to hospital<br>- Secondary diagnoses                                                                                                                                                                                                                                                   |
| 2. Pneumonia                                                     | - Yes/ no, Unilateral or bilateral etc.                                                                                                                                                                                                                                                         |
| 3. Admission to critical care facilities<br>i.e. ICU and/ or HDU | - Specific dates of transfer and discharge to/<br>from the HDU or ICU<br>- Primary cause of transfer to HDU/ ICU<br>- Need for invasive mechanical ventilation (MV)<br>including non-invasive mechanical<br>ventilation(NIV) and ECMO<br>- Other severity scores e.g. duration MV, NIV,<br>ECMO |
| 4. Mortality in hospital                                         | - Date of death<br>- Primary cause of death                                                                                                                                                                                                                                                     |



### Supplementary Appendix 3: Standardised dataset - data dictionary

| Variable name in Stata         | Description                                                                                                                                                | Coding                                                                                                                                                        |
|--------------------------------|------------------------------------------------------------------------------------------------------------------------------------------------------------|---------------------------------------------------------------------------------------------------------------------------------------------------------------|
| <b>About the data</b>          |                                                                                                                                                            |                                                                                                                                                               |
| study_group_id                 | Study group identifier (lookup codes in MS Excel metadata file)                                                                                            | Auto-numbering (_n); string                                                                                                                                   |
| Patid                          | Study specific patient ID as provided by study groups; this will only be retained in the individual datasets but dropped from the pooled dataset           | string                                                                                                                                                        |
| auto_patid                     | Auto-numbered patient ID generated for each study group dataset; this will only be retained in the individual datasets but dropped from the pooled dataset | Auto-numbering (_n)                                                                                                                                           |
| pride_patid                    | Unique patient identifier created by concatenation of study_group_id and auto-numbered patient id (auto_patid)                                             | String                                                                                                                                                        |
| data_source                    | Whether hospital, community or ICU                                                                                                                         | 1=hospital<br>2= ICU<br>3= community                                                                                                                          |
| Country                        | Country identifier                                                                                                                                         | String                                                                                                                                                        |
| <b>Patient characteristics</b> |                                                                                                                                                            |                                                                                                                                                               |
| age_years                      | Age (at admission) in years; continuous variable                                                                                                           | Place all under 1s in one category (replace <1s as '0')                                                                                                       |
| sex                            | gender                                                                                                                                                     | 1=male<br>0=female                                                                                                                                            |
| obese                          | Either clinically recorded obesity or derived from BMI (BMI>30)                                                                                            | 1= yes<br>0= no                                                                                                                                               |
| smoking                        | Current smoking status (ex and non-smokers will be considered one category)                                                                                | 1= yes<br>0= no                                                                                                                                               |
| pregnant                       | Pregnancy (for sub-group analyses including pregnant women, only women of child-bearing age (13-54 years) will be considered)                              | 1= yes<br>0= no<br>(no separate code for 'not applicable'; men and women not of child-bearing age will be dropped from any analyses including pregnant women) |
| comorbidity                    | Whether any co-existing comorbidity was present (either as recorded or derived on the basis of a record of one of the                                      | 1= any comorbidity<br>0= no recorded comorbidity                                                                                                              |

| Variable name in Stata | Description                                                                                                                                                                                                                                                                                                                                                                                                              | Coding          |
|------------------------|--------------------------------------------------------------------------------------------------------------------------------------------------------------------------------------------------------------------------------------------------------------------------------------------------------------------------------------------------------------------------------------------------------------------------|-----------------|
|                        | following comorbidities:<br>asthma, COPD, other chronic lung disease, heart disease, cerebrovascular disease (not including uncomplicated hypertension), chronic liver disease, chronic renal disease, diabetes, neurological disease (including neurodevelopmental disorders), lymphoma, leukaemia, other malignancy, immunosuppression)<br>Note: pregnancy will not be considered a 'comorbidity' and nor will obesity |                 |
| asthma                 | Asthma as recorded                                                                                                                                                                                                                                                                                                                                                                                                       | 1= yes<br>0= no |
| copd                   | COPD as recorded                                                                                                                                                                                                                                                                                                                                                                                                         | 1= yes<br>0= no |
| other_lung_ds          | Chronic pulmonary diseases (other than asthma or COPD)                                                                                                                                                                                                                                                                                                                                                                   | 1= yes<br>0= no |
| heart_ds               | Chronic heart disease as recorded (includes congenital heart disease, hypertension with cardiac complications, chronic heart failure, individuals requiring regular medication and/or follow-up for ischaemic heart disease)                                                                                                                                                                                             | 1= yes<br>0= no |
| renal_ds               | Chronic kidney disease (CKD) as recorded including CKD at stage 3, 4 or 5, chronic kidney failure, nephrotic syndrome, kidney transplantation.                                                                                                                                                                                                                                                                           | 1= yes<br>0= no |
| liver_ds               | Chronic liver disease as recorded (including cirrhosis, biliary atresia, chronic hepatitis)                                                                                                                                                                                                                                                                                                                              | 1= yes<br>0= no |
| cerebrovascular_ds     | Cerebrovascular disease as recorded (including stroke, transient ischaemic attack but not including uncomplicated hypertension)                                                                                                                                                                                                                                                                                          | 1= yes<br>0= no |
| neurological_ds        | Neurological disease as recorded (including                                                                                                                                                                                                                                                                                                                                                                              | 1= yes<br>0= no |

| Variable name in Stata          | Description                                                                                                                                                                                                                                                                                                                                                                                                                               | Coding                                                                 |
|---------------------------------|-------------------------------------------------------------------------------------------------------------------------------------------------------------------------------------------------------------------------------------------------------------------------------------------------------------------------------------------------------------------------------------------------------------------------------------------|------------------------------------------------------------------------|
|                                 | neurodevelopmental disorders)                                                                                                                                                                                                                                                                                                                                                                                                             |                                                                        |
| diabetes                        | Diabetes as recorded (including Type 1 diabetes, type 2 diabetes requiring insulin or oral hypoglycaemic drugs, diet controlled diabetes.)                                                                                                                                                                                                                                                                                                | 1= yes<br>0= no                                                        |
| immunosuppression               | Immunosuppression due to disease or treatment. Includes patients undergoing chemotherapy leading to immunosuppression; asplenia or splenic dysfunction and HIV infection at all stages.                                                                                                                                                                                                                                                   | 1=yes<br>0= no                                                         |
| swine_flu_vac                   | Swine H1N1 vaccination                                                                                                                                                                                                                                                                                                                                                                                                                    | 1= yes<br>0= no                                                        |
| <b>clinical characteristics</b> |                                                                                                                                                                                                                                                                                                                                                                                                                                           |                                                                        |
| onset_date                      | Date of onset of influenza like illness (ILI)                                                                                                                                                                                                                                                                                                                                                                                             | Recorded as date<br>dd/mm/yy                                           |
| admission_date                  | Date of first admission to hospital (whether to a general ward, HDU or ICU)                                                                                                                                                                                                                                                                                                                                                               | Recorded as date<br>dd/mm/yy                                           |
| time_to_admission               | Time (in days) from onset of symptoms to hospital admission                                                                                                                                                                                                                                                                                                                                                                               | Recorded as number of days                                             |
| symptom_score                   | Severity of illness on presentation to hospital; non-weighted score derived by assigning a score of 1 for each of the following symptoms and then adding these together (myalgia; malaise; headache; sore throat; cough; nasal symptoms including runny nose, stuffy nose, sneezing; diarrhoea/vomiting)<br>Note: fever and shortness of breath will be considered as separate variables to emphasise greater weighting of these symptoms | Recorded as score<br>(maximum score of 7 possible)                     |
| fever                           | Fever on presentation (as recorded)                                                                                                                                                                                                                                                                                                                                                                                                       | 1= yes<br>0= no                                                        |
| shortness_of_breath             | Shortness of breath at presentation (as recorded)                                                                                                                                                                                                                                                                                                                                                                                         | 1= yes<br>0= no                                                        |
| severe_respiratory_distress     | Severe respiratory distress at admission                                                                                                                                                                                                                                                                                                                                                                                                  | 1= yes<br>0= no                                                        |
| flu_diag                        | Method of diagnosis of swine flu whether clinical or laboratory diagnosis (this                                                                                                                                                                                                                                                                                                                                                           | 1= clinical<br>2= laboratory diagnosis<br>(not otherwise specified) or |

| Variable name in Stata | Description                                                                                                                                                                                                                                                                                                                                                                                                                                | Coding                                   |
|------------------------|--------------------------------------------------------------------------------------------------------------------------------------------------------------------------------------------------------------------------------------------------------------------------------------------------------------------------------------------------------------------------------------------------------------------------------------------|------------------------------------------|
|                        | includes RT-PCR, Direct Fluorescent Antibody test (DFA), Viral Culture, Rapid Antigen test )                                                                                                                                                                                                                                                                                                                                               | confirmed using various laboratory tests |
| severe_disease         | Severity was defined using standard severity measures such as AVPU, GCS, SOFA or CURB-65 scores where available. Alternatively, the following proxy indicators were used in order of preference: i) severe respiratory distress (tachypnoea, dyspnoea, evidence of alveolar flooding on radiograph, arterial blood gas analysis, cyanosis, excessive respiratory effort) ii) shortness of breath, iii) Symptom score (as defined earlier). | As provided                              |
| <b>Treatment</b>       |                                                                                                                                                                                                                                                                                                                                                                                                                                            |                                          |
| antiviral_start_date   | Date of start of antiviral treatment                                                                                                                                                                                                                                                                                                                                                                                                       | Recorded as dd/mm/yy                     |
| preadmit_antiviral     | Preadmission antiviral (either oseltamivir, zanamivir or peramivir)                                                                                                                                                                                                                                                                                                                                                                        | 1= yes<br>0= no                          |
| oseltamivir_start_date | Date of start of oseltamivir treatment                                                                                                                                                                                                                                                                                                                                                                                                     | Recorded as dd/mm/yy                     |
| preadmit_oseltamivir   | Preadmission oseltamivir                                                                                                                                                                                                                                                                                                                                                                                                                   | 1= yes<br>0= no                          |
| zanamivir_start_date   | Date of start of zanamivir treatment                                                                                                                                                                                                                                                                                                                                                                                                       | Recorded as dd/mm/yy                     |
| preadmit_zanamivir     | Preadmission zanamivir                                                                                                                                                                                                                                                                                                                                                                                                                     | 1= yes<br>0= no                          |
| antibiotic_start_date  | Date of start of antibiotic treatment                                                                                                                                                                                                                                                                                                                                                                                                      | Recorded as dd/mm/yy                     |
| hospital_oseltamivir   | Oseltamivir given in hospital                                                                                                                                                                                                                                                                                                                                                                                                              | 1= yes<br>0= no                          |
| hospital_zanamivir     | Zanamivir given in hospital                                                                                                                                                                                                                                                                                                                                                                                                                | 1= yes<br>0= no                          |
| hospital_peramivir     | Peramivir given in hospital                                                                                                                                                                                                                                                                                                                                                                                                                | 1=yes<br>0=no                            |
| hospital_antibiotic    | Antibiotics given in hospital                                                                                                                                                                                                                                                                                                                                                                                                              | 1= yes<br>0= no                          |
| antiviral_anytime      | Antiviral administered at any time (whether in the community or in hospital)                                                                                                                                                                                                                                                                                                                                                               | 1= yes<br>0= no                          |
| early_antiviral1       | Antiviral administered $\leq 2$ days of symptom onset (whether in                                                                                                                                                                                                                                                                                                                                                                          | 1= early antiviral<br>0= no antiviral    |

| Variable name in Stata | Description                                                                                                                                                                           | Coding                                             |
|------------------------|---------------------------------------------------------------------------------------------------------------------------------------------------------------------------------------|----------------------------------------------------|
|                        | the community or in hospital) versus no antiviral treatment                                                                                                                           |                                                    |
| early_antiviral2       | Antiviral administered $\leq 2$ days of symptom onset (whether in the community or in hospital) versus late antiviral treatment                                                       | 1= early antiviral<br>0= late antiviral            |
| lt_2days               | Antiviral administered $> 2$ days of symptom onset (whether in the community or in hospital) versus no antiviral treatment                                                            | 1= late antiviral ( $> 2$ days)<br>0= no treatment |
| lt_5days               | Antiviral administered $\geq 5$ days of symptom onset (whether in the community or in hospital) versus no antiviral treatment                                                         | 1= late antiviral ( $> 5$ days)<br>0= no treatment |
| oseltamivir_anytime    | Oseltamivir administered at any time (whether in the community or in hospital)                                                                                                        | 1= yes<br>0= no                                    |
| early_oseltamivir1     | Oseltamivir administered $\leq 2$ days of symptom onset (whether in the community or in hospital) versus no antiviral treatment                                                       | 1= early oseltamivir<br>0= no antiviral treatment  |
| early_oseltamivir2     | Oseltamivir administered $\leq 2$ days of symptom onset (whether in the community or in hospital) versus late oseltamivir (administered $> 2$ days after symptom onset)               | 1= early oseltamivir<br>0= late oseltamivir        |
| zanamivir_anytime      | Zanamivir administered at any time (whether in the community or in hospital)                                                                                                          | 1= yes<br>0= no                                    |
| early_zanamivir1       | Zanamivir administered $\leq 2$ days of symptom onset (whether in the community or in hospital) versus no antiviral treatment                                                         | 1= early zanamivir<br>0= no antiviral treatment    |
| early_zanamivir2       | Zanamivir administered $\leq 2$ days of symptom onset (whether in the community or in hospital) versus late zanamivir (administered $> 2$ days after symptom onset)                   | 1= early zanamivir<br>0= late zanamivir            |
| peramivir_anytime      | Peramivir administered at any time (whether in the community or in hospital); note: peramivir was authorised for emergency use in patients with swine flu during the pandemic in some | 1= yes<br>0= no                                    |

| Variable name in Stata | Description                                                                                                                                                         | Coding                                             |
|------------------------|---------------------------------------------------------------------------------------------------------------------------------------------------------------------|----------------------------------------------------|
|                        | countries                                                                                                                                                           |                                                    |
| early_peramivir1       | Peramivir administered $\leq 2$ days of symptom onset (whether in the community or in hospital) versus no antiviral treatment                                       | 1= early peramivir<br>0= no antiviral treatment    |
| early_peramivir2       | Peramivir administered $\leq 2$ days of symptom onset (whether in the community or in hospital) versus late peramivir (administered $> 2$ days after symptom onset) | 1= early peramivir<br>0= late peramivir            |
| non_nai_anytime        | Treatment with non-NAI antiviral drugs at any time (amantadine, rimantadine, ribavirin)                                                                             | 1= yes<br>0= no                                    |
| hosp_non_nai           | In-hospital treatment with non-NAI antiviral drugs (amantadine, rimantadine, ribavirin)                                                                             | 1= yes<br>0= no                                    |
| hosp_steroid           | New steroids administered in hospital (dexamethasone, hydrocortisone, prednisolone)                                                                                 | 1= yes<br>0= no                                    |
| <b>Outcomes</b>        |                                                                                                                                                                     |                                                    |
| discharge_date         | Date of discharge from hospital                                                                                                                                     | Recorded as date dd/mm/yy                          |
| length_of_stay         | Length of stay in hospital (whether general ward or ICU) in days                                                                                                    | Number of days                                     |
| critical_care          | Admission to critical care facilities (ICU)                                                                                                                         | 1= yes<br>0= no                                    |
| icu_admit_date         | Date of admission to ICU                                                                                                                                            | Recorded as dd/mm/yy                               |
| icu_discharge_date     | Date of ICU discharge                                                                                                                                               | Recorded as dd/mm/yy                               |
| icu_lengthstay         | Length of ICU stay                                                                                                                                                  | Recorded as a continuous variables (no. of days)   |
| Pneumonia              | Pneumonia as recorded (whether clinically diagnosed or radiologically diagnosed or discerned from free text chest x-ray report findings )                           | 1= yes<br>0= no                                    |
| pneum_diag             | Method of diagnosis of pneumonia (clinical or radiological)                                                                                                         | 1= radiological diagnosis<br>0= clinical diagnosis |
| death                  | Death (as recorded)                                                                                                                                                 | 1= yes<br>0= no                                    |
| dod                    | Date of death                                                                                                                                                       | Recorded as dd/mm/yy                               |
| death_cause            | Primary cause of death                                                                                                                                              | Free text                                          |
| death_cause_code       | Cause of death categories                                                                                                                                           | 1= unrelated to flu<br>2= influenza related        |

| Variable name in Stata | Description                                                                                                                                   | Coding                                                                                                                                                                             |
|------------------------|-----------------------------------------------------------------------------------------------------------------------------------------------|------------------------------------------------------------------------------------------------------------------------------------------------------------------------------------|
|                        |                                                                                                                                               | 3= sepsis<br>4= ARDS/ respiratory failure<br>5= pneumonia<br>6= multiorgan failure<br>7= brain death (unspecified)<br>8= renal failure<br>9= liver failure<br>10= shock<br>11= CVS |
| P                      | Propensity scores for treatment-yes vs. no                                                                                                    | Recorded as a continuous variable between 0 and 1                                                                                                                                  |
| ps_quintile            | Propensity scores categorised into quintiles for each individual study for NAI treatment- yes vs. no                                          | Categorical variable with values from 1 to 5 (1=lowest quintile and 5=highest quintile)                                                                                            |
| p_1                    | Propensity scores for treatment- Early treatment ( $\leq 2$ days) vs. no NAI treatment                                                        | Recorded as a continuous variable between 0 and 1                                                                                                                                  |
| ps1_quintile           | Propensity scores categorised into quintiles for each individual study for early treatment ( $\leq 2$ days) vs. no treatment                  | Categorical variable with values from 1 to 5 (1=lowest quintile and 5=highest quintile)                                                                                            |
| p_2                    | Propensity scores for treatment- Early treatment ( $\leq 2$ days) vs. Later treatment ( $> 2$ days)                                           | Recorded as a continuous variable between 0 and 1                                                                                                                                  |
| ps2_quintile           | Propensity scores categorised into quintiles for each individual study for early treatment ( $\leq 2$ days) vs. later treatment ( $> 2$ days) | Categorical variable with values from 1 to 5 (1=lowest quintile and 5=highest quintile)                                                                                            |
| p_lt2                  | Propensity scores for treatment- Later treatment ( $> 2$ days) vs. no NAI treatment                                                           | Recorded as a continuous variable between 0 and 1                                                                                                                                  |
| pslt2_quintile         | Propensity scores categorised into quintiles for each individual study for late treatment ( $> 2$ days) vs. no NAI treatment                  | Categorical variable with values from 1 to 5 (1=lowest quintile and 5=highest quintile)                                                                                            |

**Supplementary Appendix 4: Date of admission of 29,234 patients hospitalized with A(H1N1)pdm09 infection (by month)**

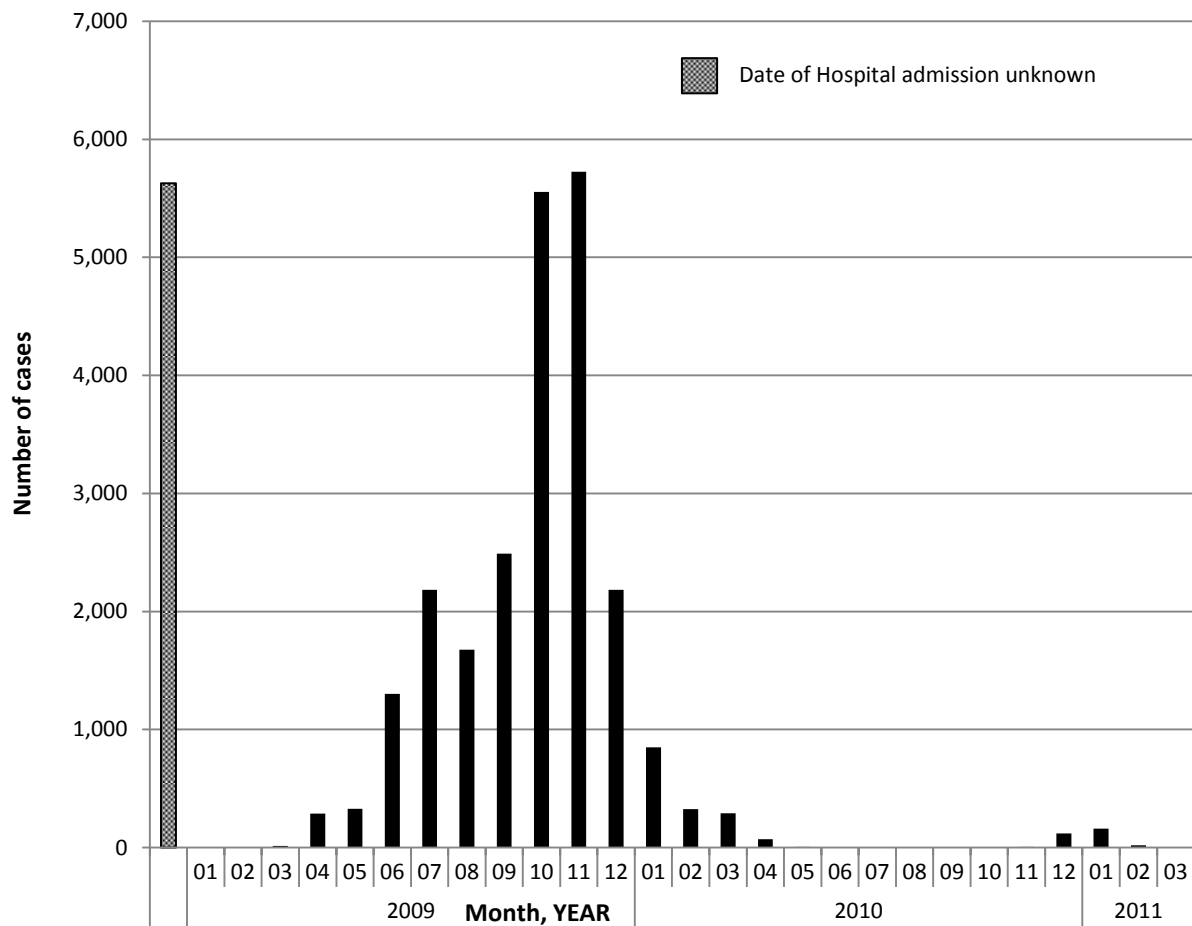

\*\* Due to scale, small numbers of hospitalisations are not visible; there were no hospitalisations in June 2010. Some patients were hospitalised due to other conditions but contracted nosocomial influenza (interval between hospital admission and symptom onset  $\geq 3$  days) (n=226; 1.03%).

**Supplementary Appendix 5: Absolute risks of mortality for various exposure categories and subgroups**

| Population Subgroups                    | Number of deaths, n/N (%) |                           |                                                            |
|-----------------------------------------|---------------------------|---------------------------|------------------------------------------------------------|
|                                         | No NAI antiviral          | NAI Antiviral at any time | Early Antiviral (initiated $\leq 2$ days of symptom onset) |
| Lab and clinically confirmed (all ages) | 959/10431 (9.2)           | 1825/18803 (9.7)          | 358/5995 (6.0)                                             |
| Lab confirmed cases (all ages)          | 721/7319 (9.9)            | 1765 /17682 (10.0)        | 356/5882 (6.1)                                             |
| Adults (16 years and above)             | 830/6813 (12.2)           | 1620/13,003 (12.5)        | 307/3796 (8.1)                                             |
| Children (below 16 years)               | 122/3540 (3.5)            | 203/5678 (3.6)            | 50/2155 (2.3)                                              |
| Pregnant women                          | 45/845 (5.3)              | 132/1321 (10.0)           | 21/458 (4.6)                                               |
| ICU patients (all ages)                 | 387/881 (43.9)            | 1570/5967 (26.3)          | 318/1310 (24.3)                                            |
| Adults ( $\geq 16$ years)               | 326/610 (53.4)            | 1393/4493 (31.0)          | 276/1000 (27.6)                                            |
| Children (<16 years)                    | 58/267 (21.7)             | 176/1458 (12.1)           | 42/305 (13.8)                                              |



## Supplementary Appendix 6: Characteristics of individual studies contributing to the pooled analysis and publications arising from them

| Study No. | Country          | Patients source                          | Total No. of cases supplied | No. of cases used† | Median age, years at hospital admission (Range) | Male (%) | No. of cases with any comorbidity § (%) | Time to hospital admission, days, median (IQR) | No. treated with NAI (%) | Time to NAI after symptoms, days, median (IQR) | Length of hospital stay, days, median (IQR) | No. of cases admitted to ICU (%) | No. of deceased patients (%) | Publications arising from dataset‡ |
|-----------|------------------|------------------------------------------|-----------------------------|--------------------|-------------------------------------------------|----------|-----------------------------------------|------------------------------------------------|--------------------------|------------------------------------------------|---------------------------------------------|----------------------------------|------------------------------|------------------------------------|
| 1         | Singapore        | ED; Single Center                        | 110                         | <b>110</b>         | 24 (10-56)                                      | 62 (56)  | 7 (6)                                   | 2 (1 - 3)                                      | 110 (100)                | -                                              | 4 (3 - 5)                                   | 0(0)                             | 0 (0)                        | 1                                  |
| 2         | Bangladesh       | Hospital; Surveillance                   | 147                         | <b>141</b>         | 23 (<1 -72)                                     | 85 (60)  | 43 (31)                                 | 3 (2 - 5)                                      | 26 (18)                  | 4 (2 - 6)                                      | 5 (3 - 6)                                   | -                                | 5 (4)                        | 2                                  |
| 3         | Iran             | Hospital; Single Center                  | 46                          | <b>46</b>          | 32 (15 - 66)                                    | 26 (57)  | 19 (41)                                 | 5 (3 - 7)                                      | 46 (100)                 | 5 (3 - 7)                                      | -                                           | 20 (43)                          | 7 (46)                       | 3                                  |
| 4         | Spain            | ICU; Multi-center                        | 1091                        | <b>1078</b>        | 47 (1 - 86)                                     | 663 (62) | 571 (54)                                | 4 (2 - 6)                                      | 1063 (99)                | 5 (3 - 7)                                      | 15 (9 - 28)                                 | 1078 (100)                       | 265 (25)                     | 4, 5                               |
| 5         | Mexico           | Outpatients, Hospitalised; Multi-center  | 446                         | <b>266</b>         | 39 (<1 - 85)                                    | 161 (61) | 63 (24)                                 | 0 (0 - 0)                                      | 266 (100)                | 5 (0 - 8)                                      | 15 (11 - 22)                                | 76 (29)                          | 28 (11)                      | 6                                  |
| 6         | UK               | ICU; Single Center                       | 8                           | <b>6</b>           | 5 (<1 - 8)                                      | 3 (75)   | 5 (83)                                  | -                                              | 6 (100)                  | -                                              | -                                           | 6 (100)                          | 0(0)                         | 7                                  |
| 7         | Netherlands      | ICU; Multi-center                        | 14                          | <b>14</b>          | 13 (<1 - 16)                                    | 9 (64)   | 8 (57)                                  | -                                              | 14 (100)                 | 3 (2 - 11)                                     | -                                           | 14 (100)                         | 0(0)                         | 8                                  |
| 8         | Hong Kong, China | ICU; Single Center                       | 17                          | <b>17</b>          | 54 (19 - 65)                                    | 11 (65)  | 6 (35)                                  | 4 (3 - 7)                                      | 16 (94)                  | *                                              | 41 (24 - 60)                                | 17 (100)                         | 1 (6)                        | -                                  |
| 9         | Lithuania        | Hospital; Multi-center                   | 121                         | <b>121</b>         | 31 (18 - 83)                                    | 52 (43)  | 42 (35)                                 | 2 (1 - 3)                                      | 70 (58)                  | 3 (2 - 6)                                      | 6 (4 - 8)                                   | 9 (8)                            | 6 (5)                        | 9                                  |
| 10        | Switzerland      | Outpatients, Hospitalised; Single Center | 15                          | <b>14</b>          | 43 (30 - 82)                                    | 10 (71)  | 9 (64)                                  | 5 (2 - 6)                                      | 14 (100)                 | 7 (3 - 9)                                      | 9 (8 - 13)                                  | 6 (43)                           | 0(0)                         | 10                                 |
| 11        | Germany          | Hospital; Single Center                  | 315                         | <b>154</b>         | 1 (<1 - 18)                                     | 85 (55)  | 98 (64)                                 | 2 (1 - 4)                                      | 42 (27)                  | -                                              | 3 (1 - 5)                                   | 11 (7)                           | 1 (1)                        | -                                  |
| 12        | China            | Outpatients, Hospitalised; Single Center | 65                          | <b>50</b>          | 43 (14 - 75)                                    | 31 (62)  | 32 (64)                                 | 5 (4 - 7)                                      | 50 (100)                 | 5 (4 - 7)                                      | 7 (5 - 11)                                  | 34 (68)                          | 9 (18)                       | -                                  |
| 13        | China            | Hospital; Multi-center                   | 155                         | <b>155</b>         | 39 (15 - 93)                                    | 90 (58)  | 62 (40)                                 | 5 (3 - 7)                                      | 132 (85)                 | *                                              | 10 (4 - 17)                                 | 74 (48)                          | 27 (17)                      | 11                                 |
| 14        | Turkey           | ICU; Single Center                       | 20                          | <b>20</b>          | 36 (15 - 72)                                    | 10 (50)  | 10 (50)                                 | 5 (3 - 6)                                      | 20 (100)                 | 5 (4 - 6)                                      | 5 (4 - 8)                                   | 20 (100)                         | 9 (45)                       | 12                                 |
| 15        | Argentina        | Outpatients, Hospitalised; Single Center | 36                          | <b>23</b>          | 38 (16 - 82)                                    | 14 (61)  | 9 (39)                                  | 3 (2 - 4)                                      | 23 (100)                 | 3 (2 - 4)                                      | 8 (4 - 19)                                  | 7 (30)                           | 5 (22)                       | 13                                 |
| 16        | Spain            | Outpatients, Hospitalised; Multi-center  | 57                          | <b>48</b>          | 46 (18 - 84)                                    | 28 (58)  | 26 (54)                                 | 5 (3 - 7)                                      | 48 (100)                 | 6 (3 - 7)                                      | 5 (3 - 9)                                   | 11 (23)                          | 2 (4)                        | 14                                 |

| Study No. | Country      | Patients source                          | Total No. of cases supplied | No. of cases used† | Median age, years at hospital admission (Range) | Male (%) | No. of cases with any comorbidity § (%) | Time to hospital admission, days, median (IQR) | No. treated with NAI (%) | Time to NAI after symptoms, days, median (IQR) | Length of hospital stay, days, median days (IQR) | No. of cases admitted to ICU (%) | No. of deceased patients (%) | Publications arising from dataset‡ |
|-----------|--------------|------------------------------------------|-----------------------------|--------------------|-------------------------------------------------|----------|-----------------------------------------|------------------------------------------------|--------------------------|------------------------------------------------|--------------------------------------------------|----------------------------------|------------------------------|------------------------------------|
| 17        | Iran         | Outpatients, Hospitalised; Single Center | 434                         | 143                | 34 (14 - 86)                                    | 66 (46)  | 66 (48)                                 | 4 (2 - 6)                                      | 143 (100)                | 4 (2 - 6)                                      | 3 (2 - 5)                                        | 52 (36)                          | 17 (12)                      | 15                                 |
| 18        | Canada       | Outpatients, Hospitalised; Single Center | 148                         | 32                 | 5 (<1 - 18)                                     | 20 (63)  | 20 (63)                                 | 3 (1 - 5)                                      | 27 (84)                  | -                                              | 4 (2 - 9)                                        | 7 (22)                           | 0(0)                         | 16                                 |
| 19        | South Africa | Hospital; Single Center                  | 46                          | 41                 | 27 (<1 - 70)                                    | 4 (10)   | 26 (63)                                 | 1 (0 - 4)                                      | 41 (100)                 | 2 (0 - 4)                                      | 15 (7 - 26)                                      | 26 (62)                          | 14 (34)                      | 17                                 |
| 20        | Argentina    | Hospital; Multi-center                   | 112                         | 112                | 27 (<1 - 79)                                    | 32 (29)  | 39 (35)                                 | 2 (1 - 4)                                      | 109 (97)                 | 3 (1 - 5)                                      | 5 (3 - 11)                                       | 43 (38)                          | 23 (21)                      | -                                  |
| 21        | Poland       | Hospital; Single Center                  | 24                          | 24                 | 7 (<1 - 17)                                     | 8 (33)   | 8 (33)                                  | -                                              | 24 (100)                 | 2 (1 - 4)                                      | 4 (3 - 5)                                        | 1 (4)                            | 0(0)                         | 18                                 |
| 22        | Jordan       | Hospital; Single Center                  | 81                          | 45                 | 7 (1 - 19)                                      | 27 (60)  | 42 (100)                                | -                                              | 45 (100)                 | 1 (1 - 1)                                      | 4 (3 - 6)                                        | 6 (14)                           | 0(0)                         | 19                                 |
| 23        | Israel       | Outpatients, Hospitalised; Single Center | 73                          | 37                 | 6 (1 - 17)                                      | 19 (51)  | 23 (62)                                 | -                                              | 25 (68)                  | -                                              | 3 (2 - 6)                                        | 2 (5)                            | 0(0)                         | 20                                 |
| 24        | Australia    | Hospital; Single Center                  | 106                         | 95                 | 28 (<1 - 76)                                    | 35 (37)  | 62 (65)                                 | -                                              | 84 (88)                  | -                                              | 2 (1 - 4)                                        | 13 (14)                          | 2 (2)                        | 21                                 |
| 25        | Turkey       | Hospital; Single Center                  | 204                         | 204                | 31 (16 - 86)                                    | 98 (48)  | 98 (48)                                 | 3 (2 - 4)                                      | 196 (96)                 | -                                              | 3 (2 - 5)                                        | 19 (9)                           | 4 (2)                        | 22                                 |
| 26        | Morocco      | Outpatients, Hospitalised; Single Center | 640                         | 16                 | 29 (1 - 42)                                     | 6 (38)   | 12 (75)                                 | -                                              | 16 (100)                 | -                                              | 4 (3 - 4)                                        | 2 (13)                           | 0(0)                         | 23                                 |
| 27        | France       | Hospital; Single Center                  | 1770                        | 1220               | 38 (<1 - 104)                                   | 638 (52) | 616 (50)                                | 2 (1 - 4)                                      | 1101 (90)                | 2 (1 - 5)                                      | 6 (3 - 14)                                       | 881 (72)                         | 175 (14)                     | 24, 25                             |
| 28        | Spain        | Hospital; Multi-center                   | 698                         | 697                | 41 (16 - 97)                                    | 366 (53) | 345 (50)                                | 3 (2 - 5)                                      | 665 (94)                 | 3 (2 - 6)                                      | 6 (3 - 9)                                        | 118 (17)                         | 37 (5)                       | 26, 27                             |
| 29        | Singapore    | Outpatients, Hospitalised; Single Center | 584                         | 339                | 19 (<1 - 93)                                    | 175 (52) | 161 (47)                                | 2 (1 - 3)                                      | 284 (84)                 | 3 (2 - 5)                                      | 2 (1 - 4)                                        | 22 (6)                           | 3 (1)                        | 28                                 |
| 30        | Canada       | Hospital; Multi-center                   | 300                         | 299                | 6 (<1 - 19)                                     | 176 (59) | 196 (66)                                | 2 (1 - 5)                                      | 270 (90)                 | 3 (1 - 5)                                      | 5 (3 - 11)                                       | 131 (44)                         | 7 (2)                        | 29, 30                             |
| 31        | Australia    | Hospital; Single Center                  | 105                         | 105                | 42 (15 - 79)                                    | 49 (47)  | 71 (68)                                 | 3 (2 - 5)                                      | 89 (85)                  | 3 (2 - 5)                                      | 5 (3 - 8)                                        | 27 (26)                          | 3 (3)                        | 31                                 |
| 32        | Hong Kong    | Hospital; Single Center                  | 69                          | 61                 | 45 (18 - 95)                                    | 24 (39)  | 43 (70)                                 | 2 (1 - 3)                                      | 55 (90)                  | 3 (2 - 5)                                      | 4 (2 - 6)                                        | 3 (5)                            | 1 (2)                        | 32                                 |
| 33        | Argentina    | Hospital; Single Center                  | 197                         | 196                | 36 (<1 - 89)                                    | 94 (48)  | 116 (59)                                | 3 (1 - 7)                                      | 196 (100)                | 5 (2 - 7)                                      | 6 (3 - 12)                                       | 73 (38)                          | 49 (25)                      | -                                  |

| Study No. | Country   | Patients source                               | Total No. of cases supplied | No. of cases used† | Median age, years at hospital admission (Range) | Male (%)  | No. of cases with any comorbidity § (%) | Time to hospital admission, days, median (IQR) | No. treated with NAI (%) | Time to NAI after symptoms, days, median (IQR) | Length of hospital stay, days, median (IQR) | No. of cases admitted to ICU (%) | No. of deceased patients (%) | Publications arising from dataset‡ |
|-----------|-----------|-----------------------------------------------|-----------------------------|--------------------|-------------------------------------------------|-----------|-----------------------------------------|------------------------------------------------|--------------------------|------------------------------------------------|---------------------------------------------|----------------------------------|------------------------------|------------------------------------|
| 34        | Argentina | ICU, Hospitalised, Outpatients; Single Center | 354                         | <b>194</b>         | 33 (<1 - 84)                                    | 97 (51)   | 36 (19)                                 | 4 (2 - 6)                                      | 116 (60)                 | -                                              | 5 (2 - 8)                                   | 29 (15)                          | 27 (14)                      | -                                  |
| 35        | Spain     | Hospital; Single Center                       | 91                          | <b>91</b>          | 42 (13-79)                                      | 37 (41)   | 63 (69)                                 | 2 (0 - 3)                                      | 83 (91)                  | 2 (0 - 4)                                      | 7 (4 - 23)                                  | 30 (33)                          | 7 (8)                        | 33                                 |
| 36        | Argentina | Outpatients, Hospitalised; Single Center      | 513                         | <b>68</b>          | 34 (<1 - 80)                                    | 36 (53)   | 16 (24)                                 | -                                              | 49 (72)                  | -                                              | -                                           | 16 (24)                          | 5 (7)                        | 34                                 |
| 37        | UK        | Hospital; Surveillance                        | 272                         | <b>222</b>         | 27 (16 - 48)                                    | 0 (0)     | 70 (32)                                 | 2 (0 - 4)                                      | 186 (84)                 | 2 (1 - 5)                                      | 3 (2 - 6)                                   | 44 (20)                          | 2 (1)                        | 35, 36                             |
| 38        | Italy     | Hospital; Single Center                       | 81                          | <b>81</b>          | 32 (1 - 81)                                     | 45 (56)   | 43 (53)                                 | -                                              | 69 (85)                  | 2 (1 - 3)                                      | 5 (3 - 7)                                   | 9 (11)                           | 2 (2)                        | 37                                 |
| 39        | Turkey    | Hospital; Single Center                       | 15                          | <b>15</b>          | 2 (<1 - 8)                                      | 7 (47)    | 1 (7)                                   | 0 (0 - 1)                                      | 15 (100)                 | 0 (0 - 1)                                      | 1 (1 - 3)                                   | 4 (27)                           | 1 (7)                        | 38                                 |
| 40        | Israel    | Hospital; Multi-center                        | 506                         | <b>504</b>         | 43 (16 - 93)                                    | 240 (48)  | 305 (61)                                | 3 (1 - 4)                                      | 450 (89)                 | 3 (2 - 5)                                      | 6 (5 - 10)                                  | 34 (7)                           | 18 (4)                       | 39                                 |
| 41        | Brazil    | Hospital; Single Center                       | 21                          | <b>21</b>          | 23 (15 - 32)                                    | 0 (0)     | 1 (5)                                   | 1 (0 - 2)                                      | 21 (100)                 | 1 (0 - 2)                                      | 6 (3 -12)                                   | 6 (30)                           | 0 (0)                        | 40                                 |
| 42        | France    | Outpatients, Hospitalised; Single Center      | 549                         | <b>84</b>          | 24 (14 - 42)                                    | 0 (0)     | 26 (33)                                 | 2 (1 - 2)                                      | 73 (87)                  | 2 (1 - 2)                                      | 4 (3 - 4)                                   | 1 (1)                            | 0 (0)                        | 41                                 |
| 43        | Greece    | Hospital; Single Center                       | 34                          | <b>34</b>          | 34 (14 - 65)                                    | 23 (68)   | 25 (74)                                 | -                                              | 34 (100)                 | *                                              | 6 (5 - 6)                                   | 0 (0)                            | 0 (0)                        | 42                                 |
| 44        | Brazil    | ICU; Multi-center                             | 37                          | <b>37</b>          | 33 (18 - 80)                                    | 17 (46)   | 13 (35)                                 | 6 (4 - 10)                                     | 33 (89)                  | -                                              | 9 (6 - 23)                                  | 37 (100)                         | 21 (57)                      | 43                                 |
| 45        | Brazil    | Hospital; Multi-center                        | 164                         | <b>163</b>         | 32 (<1 - 73)                                    | 81 (50)   | -                                       | 5 (3 - 7)                                      | 93 (57)                  | 5 (3 - 7)                                      | 6 (3 - 11)                                  | 92 (56)                          | 49 (30)                      | 44                                 |
| 46        | Finland   | ICU; Multi-center                             | 132                         | <b>132</b>         | 49 (<1 - 88)                                    | 85 (64)   | 96 (73)                                 | 3 (1 - 6)                                      | 126 (95)                 | 4 (2 - 6)                                      | 14 (7 - 26)                                 | 132 (100)                        | 10 (8)                       | 45                                 |
| 47        | Egypt     | Hospital; Surveillance                        | 1943                        | <b>1941</b>        | 21 (<1 - 88)                                    | 1067 (55) | 360 (19)                                | 2 (1 - 3)                                      | 1941 (100)               | 2 (1 - 3)                                      | 5 (4 - 7)                                   | 375 (83)                         | 457 (24)                     | -                                  |
| 48        | USA       | Hospital; Single Center                       | 307                         | <b>304</b>         | 6 (<1 - 22)                                     | 185 (61)  | 216 (71)                                | 3 (1 - 5)                                      | 268 (88)                 | 3 (1 - 5)                                      | 3 (2 - 6)                                   | 79 (26)                          | 8 (3)                        | 46                                 |
| 49        | Turkey    | Hospital; Surveillance                        | 114                         | <b>114</b>         | 6 (<1 - 16)                                     | 68 (60)   | 67 (59)                                 | 2 (2 - 4)                                      | 114 (100)                | 2 (2 - 4)                                      | 6 (5 - 10)                                  | 12 (11)                          | 0 (0)                        | 47                                 |
| 50        | Canada    | Hospital; Single Center                       | 81                          | <b>80</b>          | 1 (<1 - 16)                                     | 42 (53)   | 38 (48)                                 | 4 (2 - 7)                                      | 53 (66)                  | 5 (4 - 7)                                      | 4 (2 - 9)                                   | 12 (15)                          | 1 (1)                        | 48                                 |
| 51        | Denmark   | ICU; Surveillance                             | 53                          | <b>51</b>          | 47 (3 - 80)                                     | 30 (59)   | 37 (73)                                 | 3 (1 - 6)                                      | 47 (92)                  | 5 (2 - 8)                                      | 15 (3 - 26)                                 | 51 (100)                         | 18 (35)                      | 49                                 |

| Study No. | Country      | Patients source                          | Total No. of cases supplied | No. of cases used† | Median age, years at hospital admission (Range) | Male (%)  | No. of cases with any comorbidity § (%) | Time to hospital admission, days, median (IQR) | No. treated with NAI (%) | Time to NAI after symptoms, days, median (IQR) | Length of hospital stay, days, median (IQR) | No. of cases admitted to ICU (%) | No. of deceased patients (%) | Publications arising from dataset‡ |
|-----------|--------------|------------------------------------------|-----------------------------|--------------------|-------------------------------------------------|-----------|-----------------------------------------|------------------------------------------------|--------------------------|------------------------------------------------|---------------------------------------------|----------------------------------|------------------------------|------------------------------------|
| 52        | Saudi Arabia | Hospital; Single Center                  | 127                         | <b>127</b>         | 27 (11 - 79)                                    | 100 (79)  | 67 (53)                                 | 3 (1 - 4)                                      | 127 (100)                | 3 (1 - 4)                                      | 6 (5 - 9)                                   | 15 (12)                          | 4 (3)                        | 50                                 |
| 53        | Brazil       | Outpatients, Hospitalised; Surveillance  | 16383                       | <b>3139</b>        | 26 (<1 - 94)                                    | 1283 (41) | 1334 (48)                               | -                                              | 555 (18)                 | -                                              | -                                           | -                                | 171 (5)                      | -                                  |
| 54        | Slovenia     | Outpatients, Hospitalised; Single Center | 78                          | <b>50</b>          | 30 (<1 - 87)                                    | 36 (72)   | 20 (40)                                 | 2 (1 - 5)                                      | 33 (66)                  | 4 (2 - 6)                                      | 4 (2 - 6)                                   | 4 (8)                            | 3 (6)                        | -                                  |
| 55        | Japan        | Hospital; Single Center                  | 104                         | <b>103</b>         | 7 (<1 - 72)                                     | 53(51)    | 27 (26)                                 | 2 (1 - 3)                                      | 103 (100)                | 2 (1 - 3)                                      | 7 (5 - 9)                                   | 5 (5)                            | 1 (1)                        | 51                                 |
| 56        | India        | Hospital; Single Center                  | 61                          | <b>61</b>          | 22 (<1 - 60)                                    | 35 (57)   | 16 (26)                                 | 5 (3 - 7)                                      | 61 (100)                 | 5 (3 - 7)                                      | 7 (6 - 11)                                  | 3 (5)                            | 9 (15)                       | -                                  |
| 57        | Mexico       | Outpatients, Hospitalised; Surveillance  | 127289                      | <b>6520</b>        | 29 (<1 - 99)                                    | 2940 (45) | 1581 (24)                               | 2 (1 - 5)                                      | 1167 (18)                | -                                              | 4 (2 - 7)                                   | 563 (9)                          | 795 (12)                     | 52                                 |
| 58        | China        | Hospital; Single Center                  | 72                          | <b>72</b>          | 41 (18 - 66)                                    | 54 (75)   | 23 (32)                                 | 8 (6 - 10)                                     | 72 (100)                 | 7 (4 - 9)                                      | 10 (6 - 19)                                 | 35 (49)                          | 10 (14)                      | 53                                 |
| 59        | Croatia      | Hospital; Single Center                  | 169                         | <b>169</b>         | 29 (<1 - 83)                                    | 95 (56)   | 71 (42)                                 | 2 (1 - 4)                                      | 139 (82)                 | 2 (1 - 5)                                      | 6 (4 - 10)                                  | 34 (20)                          | 4 (2)                        | 54                                 |
| 60        | UK           | Hospital; Multi-center                   | 1520                        | <b>1520</b>        | 26 (<1 - 95)                                    | 720 (47)  | 745 (49)                                | 2 (1 - 4)                                      | 1124 (74)                | 3 (1 - 5)                                      | 3 (2 - 7)                                   | 250 (16)                         | 81 (5)                       | 55                                 |
| 61        | Poland       | Hospital; Single Center                  | 13                          | <b>13</b>          | 27 (6 - 75)                                     | 4 (31)    | 5 (38)                                  | 2 (0 - 2)                                      | 10 (77)                  | 5 (2 - 9)                                      | 11 (7 - 16)                                 | 4 (31)                           | 3 (23)                       | -                                  |
| 62        | Slovenia     | Hospital; Single Center                  | 66                          | <b>64</b>          | 39 (16 - 87)                                    | 31 (48)   | 37 (58)                                 | 4 (2 - 6)                                      | 62 (97)                  | 4 (2 - 6)                                      | 4 (3 - 6)                                   | 9 (14)                           | 2 (3)                        | 56                                 |
| 63        | Serbia       | Hospital; Single Center                  | 98                          | <b>98</b>          | 27 (14 - 88)                                    | 68 (69)   | 18 (18)                                 | 3 (1 - 5)                                      | 69 (70)                  | 3 (1 - 5)                                      | 7 (6 - 9)                                   | 6 (6)                            | 2 (2)                        | 57                                 |
| 64        | UK           | ICU; Single Center                       | 24                          | <b>24</b>          | 48 (22 - 80)                                    | 13 (54)   | 20 (83)                                 | 5 (3 - 8)                                      | 24 (100)                 | 5 (3 - 9)                                      | 22 (8 - 43)                                 | 24 (100)                         | 7 (29)                       | 58                                 |
| 65        | Argentina    | Hospital; Multi-center                   | 251                         | <b>250</b>         | 0.8 (<1 - 19)                                   | 130 (52)  | 81 (34)                                 | 4 (2 - 7)                                      | 208 (83)                 | 7 (4 - 10)                                     | 8 (5 - 13)                                  | 46 (18)                          | 13 (5)                       | 59                                 |
| 66        | China        | Hospital; Multi-center                   | 367                         | <b>367</b>         | 21 (<1 - 84)                                    | 214 (58)  | 52 (14)                                 | 2 (1 - 4)                                      | 362 (99)                 | 3 (1 - 5)                                      | 7 (5 - 10)                                  | 57 (16)                          | 20 (5)                       | -                                  |
| 67        | Austria      | Outpatients, Hospitalised; Multi-center  | 540                         | <b>341</b>         | 21 (<1 - 91)                                    | 241 (71)  | 122 (36)                                | -                                              | 241 (71)                 | -                                              | 7 (5 - 9)                                   | 47 (14)                          | 14 (4)                       | 60                                 |
| 68        | Iran         | Hospital; Multi-center                   | 484                         | <b>484</b>         | 31 (1 - 84)                                     | 201 (42)  | 45 (9)                                  | 3 (2 - 6)                                      | 464 (96)                 | 3 (2 - 7)                                      | 2 (2 - 4)                                   | 44 (9)                           | 6 (1)                        | 61                                 |
| 69        | Mongolia     | Hospital; Surveillance                   | 204                         | <b>202</b>         | 21 (1 - 76)                                     | 105 (52)  | 80 (40)                                 | 3 (1 - 5)                                      | 107 (53)                 | -                                              | 5 (4 - 7)                                   | 6 (3)                            | 0 (0)                        | -                                  |

| Study No.                                                                                 | Country      | Patients source                         | Total No. of cases supplied | No. of cases used† | Median age, years at hospital admission (Range) | Male (%)  | No. of cases with any comorbidity § (%) | Time to hospital admission, days, median (IQR) | No. treated with NAI (%) | Time to NAI after symptoms, days, median (IQR) | Length of hospital stay, days, median (IQR) | No. of cases admitted to ICU (%) | No. of deceased patients (%) | Publications arising from dataset‡ |
|-------------------------------------------------------------------------------------------|--------------|-----------------------------------------|-----------------------------|--------------------|-------------------------------------------------|-----------|-----------------------------------------|------------------------------------------------|--------------------------|------------------------------------------------|---------------------------------------------|----------------------------------|------------------------------|------------------------------------|
| 70                                                                                        | Germany      | Hospital; Single Center                 | 92                          | 92                 | 4 (<1 - 18)                                     | 47 (51)   | 13 (14)                                 | 2 (1 - 4)                                      | 28 (30)                  | 2 (1 - 5)                                      | 3 (2 - 5)                                   | 6 (7)                            | 0 (0)                        | 62                                 |
| 71                                                                                        | Australia    | Hospital; Multi-centre                  | 601                         | 458                | 4 (<1 - 15)                                     | 266 (58)  | 208 (45)                                | 2 (1 - 4)                                      | 245 (53)                 | 2 (1 - 6)                                      | 2 (1 - 5)                                   | 54 (12)                          | 3 (1)                        | 63                                 |
| 72                                                                                        | Saudi Arabia | Outpatients, Hospitalised; Surveillance | 3228                        | 2362               | 17 (<1 - 90)                                    | 1187 (50) | 533 (23)                                | 2 (1 - 3)                                      | 2296 (97)                | 2 (1 - 4)                                      | -                                           | 209 (9)                          | 25 (1)                       | -                                  |
| 73                                                                                        | Bangladesh   | Hospital; Single Center                 | 28                          | 8                  | 23 (3 - 50)                                     | 2 (25)    | 1 (13)                                  | 1 (0 - 4)                                      | 8 (100)                  | 1 (0 - 4)                                      | 6 (4 - 6)                                   | -                                | 0 (0)                        | 64                                 |
| 74                                                                                        | USA          | ICU; Multi-center                       | 630                         | 630                | 47 (13 - 92)                                    | 285 (45)  | 367 (58)                                | 4 (2 - 7)                                      | 586 (93)                 | 3 (2 - 6)                                      | 11 (5 - 21)                                 | 630 (100)                        | 146 (23)                     | 65                                 |
| 75                                                                                        | USA          | ICU; Multi-center                       | 838                         | 838                | 6 (<1 - 20)                                     | 485 (58)  | 558 (67)                                | 2 (1 - 5)                                      | 758 (90)                 | 1 (0 - 3)                                      | 7 (4 - 15)                                  | 838 (100)                        | 74 (8)                       | 66                                 |
| 76                                                                                        | UK           | Hospital; Single Center                 | 41                          | 34                 | 4 (<1 - 15)                                     | 17 (50)   | 16 (53)                                 | 3 (1 - 5)                                      | 27 (79)                  | 4 (1 - 6)                                      | 6 (3 - 15)                                  | 14 (41)                          | 9 (26)                       | 67                                 |
| 77                                                                                        | Canada       | Hospital; Single Center                 | 1014                        | 1014               | 29 (<1 - 92)                                    | 523 (52)  | 541 (53)                                | 3 (1 - 5)                                      | 746 (73)                 | *                                              | 3 (2 - 7)                                   | 167 (16)                         | 55 (5)                       | -                                  |
| 78                                                                                        | Norway       | Hospital; Single Center                 | 129                         | 129                | 47 (15 - 93)                                    | 59 (46)   | 60 (47)                                 | 3 (1 - 7)                                      | 94 (73)                  | 3 (1 - 6)                                      | 3 (1 - 6)                                   | 7 (5)                            | 1 (1)                        | 68                                 |
| <b>SUMMARY OF AVAILABLE DATA</b>                                                          |              |                                         |                             |                    |                                                 |           |                                         |                                                |                          |                                                |                                             |                                  |                              |                                    |
| <b>Studies with information on Early (≤2 days) versus Late (&gt;2 days) NAI treatment</b> |              |                                         |                             |                    |                                                 |           |                                         |                                                |                          |                                                |                                             |                                  |                              |                                    |
| TOTAL (63 studies)                                                                        |              |                                         |                             | 13,254             | 27 (<1 - 97)                                    | 6918 (52) | 5408 (41)                               | 2 (1 - 5)                                      | 13254 (100)              | 3 (1 - 5)                                      | 6 (3 - 11)                                  | 4079 (34)                        | 1300 (10)                    |                                    |
| <b>Studies with information on timing of NAI administration (as continuous variable)</b>  |              |                                         |                             |                    |                                                 |           |                                         |                                                |                          |                                                |                                             |                                  |                              |                                    |
| TOTAL (59 studies)                                                                        |              |                                         |                             | 12,284             | 27 (<1 - 97)                                    | 6404 (52) | 4896(40)                                | 2 (1 - 5)                                      | 12284 (100)              | 3 (1 - 5)                                      | 6 (3 - 11)                                  | 3838 (35)                        | 1224 (10)                    |                                    |
| <b>ALL STUDIES</b>                                                                        |              |                                         |                             |                    |                                                 |           |                                         |                                                |                          |                                                |                                             |                                  |                              |                                    |
| TOTAL (78 studies)                                                                        |              |                                         |                             | 29,234             | 26 (<1 - 104)                                   | 14431(49) | 11011 (38)                              | 2 (1 - 5)                                      | 18803 (64)               | 3 (1 - 5)                                      | 5 (2 - 9)                                   | 6848 (28)                        | 2784 (10)                    |                                    |

ED, Emergency department; IQR, interquartile range (25<sup>th</sup> and 95<sup>th</sup> percentile)

†Include hospitalised patients with complete information on NAI treatment and survival status; §comorbidity as a defined in supplementary appendix 3; ‡ publications emerging from these datasets whether referring specifically to mortality or not; \* data supplied as binary variable (Early (≤2 days) versus Later (>2 days) NAI treatment)

## ‡Publications arising from each dataset

1. Ling LM, Chow AL, Lye DC, et al. Effects of early oseltamivir therapy on viral shedding in 2009 pandemic influenza A (H1N1) virus infection. *Clinical Infectious Diseases* 2010; **50**(7): 963-9.
2. Azziz-Baumgartner E, Rahman M, Al Mamun A, et al. Early Detection of Pandemic (H1N1) 2009, Bangladesh. *Emerging infectious diseases* 2012; **18**(1): 146.
3. Tabarsi P, Moradi A, Marjani M, et al. Factors associated with death or intensive care unit admission due to pandemic 2009 influenza A (H1N1) infection. *Annals of Thoracic Medicine* 2011; **6**(2): 91-5.
4. Rodríguez A, Díaz E, Martín-Loeches I, et al. Impact of early oseltamivir treatment on outcome in critically ill patients with 2009 pandemic influenza A. *Journal of antimicrobial chemotherapy* 2011; **66**(5): 1140-9.
5. Rodriguez A, Martin-Loeches I, Bonastre J, et al. First influenza season after the 2009 pandemic influenza: Report of the first 300 ICU admissions in Spain. . *Medicina Intensiva* 2011; **35**(4): 208-16.
6. Higuera Iglesias AL, Kudo K, Manabe T, et al. Reducing occurrence and severity of pneumonia due to pandemic H1N1 2009 by early oseltamivir administration: a retrospective study in Mexico. *PLoS ONE [Electronic Resource]* 2011; **6**(7).
7. Seale AC, Toussaint FS, Finn A, Fraser JI. Prescribing in a pandemic: best use of oseltamivir in paediatric intensive care. *Arch Dis Child* 2011; **96**(9): 902-3.
8. van Zwol A, Witteveen R, Markhorst D, Geukers VG. Clinical features of a Dutch cohort of critically ill children due to the 2009 new influenza A H1N1 pandemic. *Clinical pediatrics* 2011; **50**(1): 69-72.
9. Mickienė A, Daniusevičiūtė L, Vanagaitė N, et al. Hospitalized adult patients with 2009 pandemic influenza A (H1N1) in Kaunas, Lithuania. *Medicina (Kaunas, Lithuania)* 2011; **47**(1): 11.
10. Bertisch B, Vernazza P, Boggian K. Patients with influenza A/H1N1v-associated pneumonia: the perspective of a tertiary care hospital in Switzerland. *Swiss Med Wkly* 2010; **140**: w13069.
11. Cao B, Li X-W, Mao Y, et al. Clinical features of the initial cases of 2009 pandemic influenza A (H1N1) virus infection in China. *New England Journal of Medicine* 2009; **361**(26): 2507-17.
12. Sertogullarindan B, Ozbay B, Gunini H, et al. Clinical and prognostic features of patients with pandemic 2009 influenza a (H1N1) virus in the intensive care unit. *African Health Sciences* 2011; **11**(2): 163-70.
13. Bantar C, Oliva ME, Ré HA, et al. Severe acute respiratory disease in the setting of an epidemic of swine-origin type A H1N1 influenza at a reference hospital in Entre Ríos, Argentina. *Clinical infectious diseases* 2009; **49**(9): 1458-60.
14. Riquelme R, Torres A, Rioseco ML, et al. Influenza pneumonia: a comparison between seasonal influenza virus and the H1N1 pandemic. *European Respiratory Journal* 2011; **38**(1): 106-11.
15. Dashti-Khavidaki S, Khalili H, Gholamalipour F, et al. Approach to Pandemic 2009 influenza: first report from a main referral hospital for Pandemic H1N1 influenza care in Iran. *The Journal of Infection in Developing Countries* 2010; **4**(10): 629-35.
16. Morris SK, Parkin P, Science M, et al. A retrospective cross-sectional study of risk factors and clinical spectrum of children admitted to hospital with pandemic H1N1 influenza as compared to influenza A. *BMJ Open* 2012; **2**(2).
17. Langenegger E, Coetzee A, Jacobs S, le Roux A, Theron G. Severe acute respiratory infection with influenza A (H1N1) during pregnancy. *Samj, S* 2009; **Suid-Afrikaanse Tydskrif Vir Geneeskunde**. **99**(10): 713-4.
18. Radzikowski A, Dembinski L, Talarek E, Smalisz-Skrzypczyk K, Jackowska T, Marczyńska M. Pandemic A (H1N1) influenza in hospitalized children in Warsaw, Poland. *Pediatric Infectious Disease Journal* 2011; **30** (1): 90.
19. Amayiri N, Madanat F. Retrospective analysis of pediatric cancer patients diagnosed with the pandemic H1N1 influenza infection. *Pediatric Blood & Cancer* 2011; **56**(1): 86-9.

20. Dubnov-Raz G, Somech R, Warschawski Y, Eisenberg G, Bujanover Y. Clinical characteristics of children with 2009 pandemic H1N1 influenza virus infections. *Pediatrics International* 2011; **53**(4): 426-30.
21. Keijzers GB, Vossen CNK-L, Zhang P, et al. Predicting influenza A and 2009 H1N1 influenza in patients admitted to hospital with acute respiratory illness. *Emergency Medicine Journal* 2011; **28**(6): 500-6.
22. Metan G, Bozkurt I, Agkus C, et al. Hospitalized pandemic influenza A (H1N1) patients in a university hospital. *Central European Journal of Medicine* 2011; **6**(1): 83-8.
23. Amine IL, Bajjou T, El Rhaffouli H, et al. Pandemic influenza A(H1N1) 2009 in Morocco: experience of the Mohammed V Military Teaching Hospital, Rabat, 12 June to 24 December 2009. *Eurosurveillance* 2011; **16**(23): 15-20.
24. Fuhrman C, Bonmarin I, Bitar D, et al. Adult intensive-care patients with 2009 pandemic influenza A(H1N1) infection. *Epidemiol Infect* 2011; **139**(8): 1202-9.
25. Fuhrman C, Bonmarin I, Paty AC, et al. Severe hospitalised 2009 pandemic influenza A(H1N1) cases in France, 1 July-15 November 2009. *Euro Surveillance: Bulletin Europeen sur les Maladies Transmissibles = European Communicable Disease Bulletin* 2010; **15**(2): 14.
26. Viasus D, Pano-Pardo JR, Pachon J, et al. Factors associated with severe disease in hospitalized adults with pandemic (H1N1) 2009 in Spain. *Clinical Microbiology and Infection* 2011; **17**(5): 738-46.
27. Viasus D, Pano-Pardo JR, Pachon J, et al. Timing of Oseltamivir Administration and Outcomes in Hospitalized Adults with Pandemic 2009 Influenza A (H1N1) Virus Infection. *Chest* 2011.
28. Lee CK, Lee HK, Loh TP, et al. Comparison of pandemic (H1N1) 2009 and seasonal influenza viral loads, Singapore. *Emerging infectious diseases* 2011; **17**(2): 287-91.
29. Bettinger JA, Sauve LJ, Scheifele DW, et al. Pandemic influenza in Canadian children: a summary of hospitalized pediatric cases. *Vaccine* 2010; **28**(18): 3180-4.
30. Tran D, Vaudry W, Moore DL, et al. Comparison of children hospitalized with seasonal versus pandemic influenza A, 2004-2009. *Pediatrics* 2012; **130**(3): 397-406.
31. Denholm JT, Gordon CL, Johnson PD, et al. Hospitalised adult patients with pandemic (H1N1) 2009 influenza in Melbourne, Australia. *Medical Journal of Australia* 2010; **192**(2): 84.
32. To KKW, Wong SSY, Li IWS, et al. Concurrent comparison of epidemiology, clinical presentation and outcome between adult patients suffering from the pandemic influenza A (H1N1) 2009 virus and the seasonal influenza A virus infection. *Postgraduate Medical Journal* 2010; **86**(1019): 515-21.
33. Giannella M, Alonso M, de Viedma DG, et al. Prolonged viral shedding in pandemic influenza A(H1N1): clinical significance and viral load analysis in hospitalized patients. *Clinical Microbiology and Infection* 2011; **17**(8): 1160-5.
34. Echavarría M, Querci M, Marcone D, et al. Pandemic (H1N1) 2009 cases, Buenos Aires, Argentina. *Emerging infectious diseases* 2010; **16**(2): 311.
35. Yates L, Pierce M, Stephens S, et al. Influenza A/H1N1v in pregnancy: an investigation of the characteristics and management of affected women and the relationship to pregnancy outcomes for mother and infant. *Health Technol Assess* 2010; **14**(34): 109-82.
36. Pierce M, Kurinczuk JJ, Spark P, Brocklehurst P, Knight M, Ukoss. Perinatal outcomes after maternal 2009/H1N1 infection: national cohort study. *Bmj* 2011; **342**: d3214.
37. Bassetti M, Parisini A, Calzi A, et al. Risk factors for severe complications of the novel influenza A (H1N1): analysis of patients hospitalized in Italy. *Clinical Microbiology and Infection* 2011; **17**(2): 247-50.
38. Ozkan M, Tuygun N, Erkek N, Aksoy A, Yıldız YT. Neurologic manifestations of novel influenza A (H1N1) virus infection in childhood. *Pediatric neurology* 2011; **45**(2): 72-6.
39. Hiba V, Chowdhury M, Levi-Vinograd I, Rubinovitch B, Leibovici L, Paul M. Benefit of early treatment with oseltamivir in hospitalized patients with documented 2009 influenza A (H1N1): retrospective cohort study. *Journal of antimicrobial chemotherapy* 2011; **66**(5): 1150-5.

40. Jimenez MF, El Beitune P, Salcedo MP, Von Ameln AV, Mastalir FP, Braun LD. Outcomes for pregnant women infected with the influenza A (H1N1) virus during the 2009 pandemic in Porto Alegre, Brazil. *Int J Gynaecol Obstet* 2010; **111**(3): 217-9.
41. Gérardin P, El Amrani R, Cyrille B, et al. Low clinical burden of 2009 pandemic influenza A (H1N1) infection during pregnancy on the island of La Reunion. *PloS one* 2010; **5**(5): e10896.
42. Zarogoulidis P, Kouliatsis G, Papanas N, et al. Long-Term Respiratory Follow-up of H1N1 Infection. *Viral J* 2011; **8**(1): 319.
43. Duarte PAD, Venazzi A, Youssef NCM, et al. Outcome of influenza A (H1N1) patients admitted to intensive care units in the Paraná state, Brazil. *Rev Bras Ter Intensiva* 2009; **21**(3): 231-6.
44. Yokota RT, Skalinski LM, Igansi CN, et al. Risk factors for death from pandemic (H1N1) 2009, southern Brazil. *Emerging infectious diseases* 2011; **17**(8): 1467.
45. Linko R, Pettilä V, Ruokonen E, et al. Corticosteroid therapy in intensive care unit patients with PCR-confirmed influenza A(H1N1) infection in Finland. *Acta Anaesthesiologica Scandinavica* 2011; **55**(8): 971-9.
46. Bagdure D, Curtis DJ, Dobyys E, Glodé MP, Dominguez SR. Hospitalized children with 2009 pandemic influenza A (H1N1): comparison to seasonal influenza and risk factors for admission to the ICU. *PloS one* 2010; **5**(12): e15173.
47. Torun SH, Somer A, Salman N, et al. Clinical and epidemiological characteristics of pandemic influenza A/(H1N1) in hospitalized pediatric patients at a university hospital, Istanbul, Turkey. *Journal of tropical pediatrics* 2011; **57**(3): 213-6.
48. Fanella ST, Pinto MA, Bridger NA, et al. Pandemic (H1N1) 2009 influenza in hospitalized children in Manitoba: nosocomial transmission and lessons learned from the first wave. *Infection Control and Hospital Epidemiology* 2011; **32**(5): 435-43.
49. Gubbels S, Perner A, Valentiner-Branth P, Molbak K. National surveillance of pandemic influenza A (H1N1) infection-related admissions to intensive care units during the 2009-10 winter peak in Denmark: two complementary approaches. *Euro Surveill* 2010; **15**: 49.
50. Al-Khuwaitir TS, Al-Abdulkarim AS, Abba AA, et al. H1N1 influenza A. Preliminary evaluation in hospitalized patients in a secondary care facility in Saudi Arabia. *Saudi Med J* 2009; **30**(12): 1532-6.
51. Kudo K, Takasaki J, Manabe T, et al. Systemic Corticosteroids and Early Administration of Antiviral Agents for Pneumonia with Acute Wheezing due to Influenza A (H1N1) pdm09 in Japan. *PloS one* 2012; **7**(2): e32280.
52. Chowell G, Viboud C, Simonsen L, et al. Impact of antiviral treatment and hospital admission delay on risk of death associated with 2009 A/H1N1 pandemic influenza in Mexico. *BMC Infectious Diseases* 2012; **12**(1): 97.
53. Cui W, Zhao H, Lu X, et al. Factors associated with death in hospitalized pneumonia patients with 2009 H1N1 influenza in Shenyang, China. *BMC Infectious Diseases* 2010; **10**(1): 145.
54. Čeljuska-Tošev E, Kuzman I, Draženović V, Knezović I, Čivljak R. Clinical and epidemiological characteristics of hospitalized patients with pandemic A (H1N1) 2009 influenza. *Infektološki Glasnik* 2010; **30**(4): 149-59.
55. Myles PR, Semple MG, Lim WS, et al. Predictors of clinical outcome in a national hospitalised cohort across both waves of the influenza A/H1N1 pandemic 2009-2010 in the UK. *Thorax* 2012.
56. Pecavar B, Nadrah K, Papst L, et al. Clinical characteristics of adult patients with influenza-like illness hospitalized in general ward during Influenza A H1N1 pandemic 2009/2010. *Wien Klin Wochenschr* 2011; **123**(21-22): 662-7.
57. Mikic D, Nozic D, Kojic M, et al. Clinical manifestations, therapy and outcome of pandemic influenza A (H1N1) 2009 in hospitalized patients. *Vojnosanit Pregl* 2011; **68**(3): 248-56.
58. Yeung JH, Bailey M, Perkins GD, Smith FG. Presentation and management of critically ill patients with influenza A (H1N1): a UK perspective. *Crit Care* 2009; **13**(6): 426; author reply
59. Libster R, Bugna J, Coviello S, et al. Pediatric hospitalizations associated with 2009 pandemic influenza A (H1N1) in Argentina. *New England Journal of Medicine* 2010; **362**(1): 45-55.



60. Poepl W, Hell M, Herkner H, et al. Clinical aspects of 2009 pandemic influenza A (H1N1) virus infection in Austria. *Infection* 2011; **39**: 341-52.
61. Moghadami M, Kazeroni PA, Honarvar B, et al. Influenza a (H1N1) virus pandemic in fars province: A report from Southern Iran, July-December 2009. *Iranian Red Crescent Medical Journal* 2010; **12 (3)**: 231-8.
62. Boxhammer S, Lepler R, Lenhartz H, Pust B, Hoger PH. Pandemic influenza A/H1N1-2009 in children and adolescents in Hamburg: Symptoms and course of disease in 95 hospitalized pediatric patients. *Monatsschr Kinderheilkd* 2011; **159**: 560-4.
63. Khandaker G, Rashid H, Zurynski Y, et al. Nosocomial vs community-acquired pandemic influenza A (H1N1) 2009: A nested case-control study. *Journal of Hospital Infection* 2012; **82(2)**: 94-100.
64. Islam QT, Kahhar A, Arif SM, et al. Experience of pandemic influenza a (H1N1) 2009 at Dhaka Medical College Hospital. *Journal of Medicine* 2010; **11 (2)**: 119-23.
65. Rice TW, Rubinson L, Uyeki TM, et al. Critical illness from 2009 pandemic influenza A virus and bacterial coinfection in the United States. *Critical Care Medicine* 2012; **40(5)**: 1487-98.
66. Randolph AG, Vaughn F, Sullivan R, et al. Critically ill children during the 2009-2010 influenza pandemic in the United States. *Pediatrics* 2011; **128(6)**: e1450-8.
67. Herberg JA, Jones KDJ, Paulus S, et al. Comparison of pandemic and seasonal influenza reveals higher mortality and increased prevalence of shock in children with severe H1N1/09 infection. *Pediatric Infectious Disease Journal* 2011; **30 (5)**: 438-40.
68. Mohn KG-I, Lærum BN, Skrede S, et al. Reduced Hospital Stay in Influenza Patients after Mass Vaccination during the 2009 Influenza Pandemic in Norway. *Journal of Vaccines Vaccination* 2013; **4**: 197.

**Supplementary Appendix 7: Comparison of hospitalised patients included in analysis compared with excluded patients**

| <b>Variable</b>                                                      | <b>All hospitalised patients included in analysis (NAI treatment known) n/N (%)</b> | <b>All hospitalised patients excluded from analysis (NAI status unknown) n/N (%)</b> | <b>P value</b> |
|----------------------------------------------------------------------|-------------------------------------------------------------------------------------|--------------------------------------------------------------------------------------|----------------|
| <b>Number of patients, n=32,818</b>                                  | <b>29,234 (89.1)</b>                                                                | <b>3,584 (10.9)</b>                                                                  |                |
| <b>Number of male cases, n=32,808</b>                                | 14,431 (49.4)                                                                       | 1,704 (47.6)                                                                         | 0.082          |
| <b>Age: median (IQR) in years, n=32, 586</b><br><b>Mean (SD)</b>     | 26 (11 - 44)<br>28.6 (20.7)                                                         | 30 (10 – 50)<br>32.0 (23.9)                                                          | <0.001         |
| <b>Population groups (no. of persons)</b>                            |                                                                                     |                                                                                      |                |
| Adults (≥16 years)                                                   | 19,816 (67.8)                                                                       | 2461 (68.7)                                                                          | 0.170          |
| Children (<16 years)                                                 | 9,218 (31.5)                                                                        | 1091 (30.4)                                                                          |                |
| <b>Obese* n=25,992</b>                                               | 2,607 (9)                                                                           | 154 (4)                                                                              | <0.001         |
| <b>Smoking, n=21,991</b>                                             | 2,406 (8.2)                                                                         | 67 (1.9)                                                                             | <0.001         |
| <b>Pregnant women **, n=8,041</b>                                    | 2,166 (22.8)                                                                        | 84 (7.8)                                                                             | <0.001         |
| <b>WHO Regions, n=32,818</b>                                         |                                                                                     |                                                                                      | <0.001         |
| African region                                                       | 41(0.1)                                                                             | 1 (0.03)                                                                             |                |
| Region of the Americas                                               | 14,186 (48.5)                                                                       | 2,894 (80.8)                                                                         |                |
| Eastern Mediterranean Region                                         | 5,262 (18.0)                                                                        | 20 (0.6)                                                                             |                |
| European Region                                                      | 7,272 (24.9)                                                                        | 583 (16.3)                                                                           |                |
| South-East Asia Region                                               | 210 (0.7)                                                                           | 6 (0.2)                                                                              |                |
| Western Pacific Region                                               | 2,263 (7.7)                                                                         | 80 (2.2)                                                                             |                |
| <b>A(H1N1)pdm09 diagnosis, n=32,818</b>                              |                                                                                     |                                                                                      |                |
| Laboratory confirmed                                                 | 25,001 (85.5)                                                                       | 1758 (49.1)                                                                          | <0.001         |
| Clinically diagnosed                                                 | 4,233 (14.5)                                                                        | 1,826 (50.9)                                                                         |                |
| <b>Comorbidities</b>                                                 |                                                                                     |                                                                                      |                |
| Any comorbidity, n=32,243                                            | 11,011(37.7)                                                                        | 952 (26.6)                                                                           | <0.001         |
| Asthma, n=23,965                                                     | 2,820 (9.7)                                                                         | 135 (3.8)                                                                            |                |
| COPD, n=19,907                                                       | 1,012 (3.5)                                                                         | 57 (1.6)                                                                             |                |
| Other chronic lung disease, n=18,544                                 | 2,479 (8.5)                                                                         | 177 (4.9)                                                                            |                |
| Heart disease, n=19, 087                                             | 1,624 (5.6)                                                                         | 30 (0.8)                                                                             |                |
| Renal disease, n=20,514                                              | 710 (2.4)                                                                           | 19 (0.5)                                                                             |                |
| Liver disease, n=12,346                                              | 295 (1.0)                                                                           | 0                                                                                    |                |
| Cerebrovascular disease, n=10,327                                    | 304 (1.0)                                                                           | 6 (0.2)                                                                              |                |
| Neurological disease, n=13,718                                       | 1,013 (3.5)                                                                         | 5 (0.1)                                                                              |                |
| Diabetes , n=28,217                                                  | 2,087 (7.1)                                                                         | 149 (4.2)                                                                            |                |
| Immunosuppression, n=28,775                                          | 1,803 (6.2)                                                                         | 116 (3.2)                                                                            |                |
| <b>Pandemic H1N1 vaccination, n=4,443</b>                            | 347 (7.9)                                                                           | 3 (0.1)                                                                              | <0.001         |
| <b>Time from symptom onset to hospital admission, days, n=27,060</b> |                                                                                     |                                                                                      |                |
| <b>Median (IQR),</b>                                                 | 2 (1 - 5)                                                                           | 2 (1-5)                                                                              |                |
| <b>Mean (SD)</b>                                                     | 3.25 (5.15)                                                                         | 3.61 (6.02)                                                                          | 0.0002         |

| <b>Variable</b>                                              | <b>All hospitalised patients included in analysis (NAI treatment known) n/N (%)</b> | <b>All hospitalised patients excluded from analysis (NAI status unknown) n/N (%)</b> | <b>P value</b> |
|--------------------------------------------------------------|-------------------------------------------------------------------------------------|--------------------------------------------------------------------------------------|----------------|
| <b>Other in-hospital treatment</b>                           |                                                                                     |                                                                                      |                |
| Antibiotics, n=20,613                                        | 13,230 (45.3)                                                                       | 228 (6.4)                                                                            | <0.001         |
| Corticosteroids, n=10,006                                    | 2,745 (9.4)                                                                         | 6 (0.2)                                                                              | <0.001         |
| <b>Hospital length of stay, days, median (IQR), n=24,468</b> | 5 (2 - 9)                                                                           | 3 (1-8)                                                                              | <0.001         |
| <b>Outcomes</b>                                              |                                                                                     |                                                                                      |                |
| Influenza-related pneumonia, n=17,190                        | 7,225 (24.7)                                                                        | 75 (2.1)                                                                             | <0.001         |
| Admission to critical care, n=27,966                         | 6,848 (23.4)                                                                        | 652 (18.2)                                                                           | <0.001         |
| Mortality, n=32,818                                          | 2,784 (9.5)                                                                         | 235 (6.6)                                                                            | <0.001         |

**Supplementary Appendix 8: Table summarising the laboratory confirmed or clinically diagnosed results for children <1 and <5 (all exposures)**

| <b>Treatment Exposure</b>          | <b>Children &lt;=1 year old</b> |                | <b>children &lt;=5 years</b>  |                |
|------------------------------------|---------------------------------|----------------|-------------------------------|----------------|
|                                    | <b>Adjusted† OR (95% CI)</b>    | <b>P value</b> | <b>Adjusted † OR (95% CI)</b> | <b>P value</b> |
| NAI treatment vs. No NAI treatment | 1.03 (0.56 to 1.89)             | 0.932          | 1.05 (0.66 to 1.68)           | 0.832          |
| ET (≤ 2 days) vs. LT (> 2 days)    | 0.77 (0.28 to 2.11)             | 0.613          | 1.01 (0.54 to 1.90)           | 0.969          |
| ET (≤ 2 days) vs. No NAI treatment | 1.12 (0.35 to 3.55)             | 0.849          | 1.20 (0.58 to 2.49)           | 0.623          |
| LT (> 2 days) vs. No NAI treatment | 1.73 (0.78 to 3.83)             | 0.179          | 1.38 (0.62 to 3.11)           | 0.432          |

†adjusted for treatment propensity (by quintile), corticosteroid use and antibiotic use

**Supplementary Appendix 9: Unadjusted Kaplan-Meier survival curves by time to treatment initiation (up to 5 days and after)**

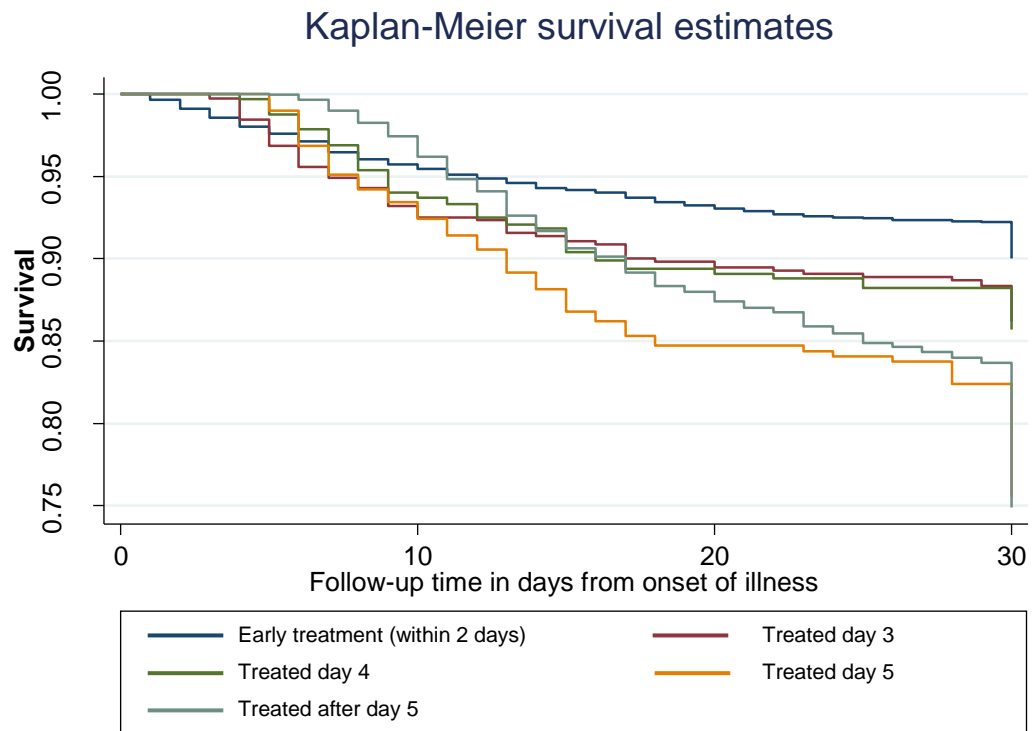

**Supplementary Appendix 10: Adjusted survival curves by time to treatment initiation (up to 6 days and after)**

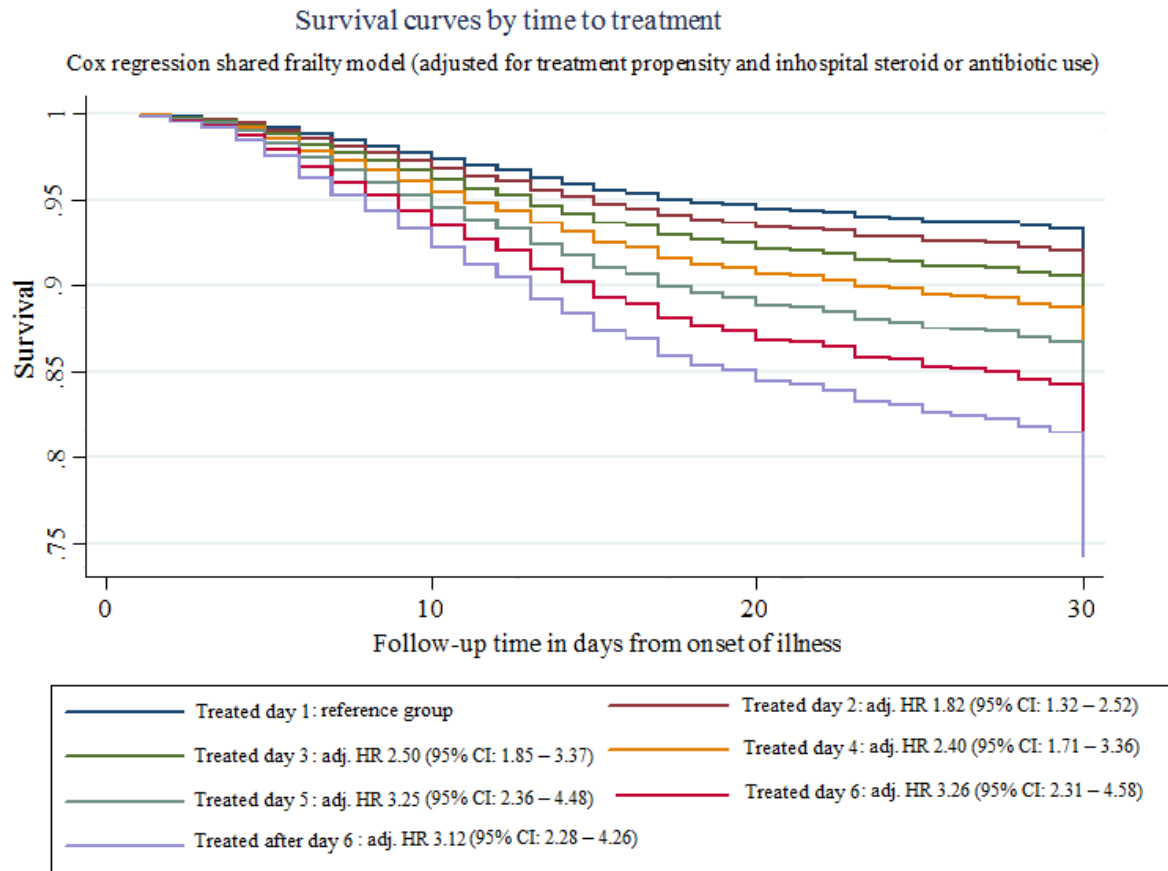

**Supplementary Appendix 11: Total population at risk, number of deaths and patients lost to follow-up over the study period for the survival analysis**

| Time Interval (days) | Total population at risk | Events (deaths) | Losses (loss to follow-up) |
|----------------------|--------------------------|-----------------|----------------------------|
| 0-7                  | 25421                    | 545             | 6809                       |
| 7-14                 | 18067                    | 697             | 5641                       |
| 14-21                | 11729                    | 345             | 1609                       |
| 21-28                | 9775                     | 144             | 609                        |
| 28-30                | 9022                     | 35              | 95                         |
| 30                   | 8892                     | 428             | 8464                       |

**Supplementary Appendix 12: Characteristics of pooled dataset of 9,218 paediatric patients (<16 years) hospitalised with A(H1N1)pdm09 virus infection included in mortality analysis**

| Characteristic (denominator)                                                               | All hospitalised patients<br>n (%) | Deceased<br>n (%) | Survived<br>n (%) |
|--------------------------------------------------------------------------------------------|------------------------------------|-------------------|-------------------|
| Number of patients <sup>a</sup>                                                            | 9,218 (100.0)                      | 325 (3.5)         | 8,893 (96.5)      |
| Number of male cases (n=9,215) <sup>b</sup>                                                | 5,199 (56.4)                       | 147 (45.2)        | 5,052 (56.8)      |
| Age: median (IQR) in years (n=9,218) <sup>b</sup>                                          | 5 (1 - 10)                         | 5 (1 - 10)        | 5 (1 - 10)        |
| Pregnant ‡ (n=307) <sup>b</sup>                                                            | 33 (5.7)                           | 1 (3.6)           | 32 (5.8)          |
| WHO Regions (n=9,218) <sup>b</sup>                                                         |                                    |                   |                   |
| African region                                                                             | 9 (0.1)                            | 0 (0)             | 9 (0.1)           |
| Region of the Americas                                                                     | 4,940 (53.6)                       | 225 (69.2)        | 4,715 (53.0)      |
| Eastern Mediterranean Region                                                               | 1,885 (20.5)                       | 48 (14.8)         | 1,837 (20.7)      |
| European Region                                                                            | 1,426 (15.5)                       | 44 (13.5)         | 1,382 (15.5)      |
| South-East Asia Region                                                                     | 46 (0.5)                           | 1 (0.3)           | 45 (0.5)          |
| Western Pacific Region                                                                     | 912 (9.9)                          | 7 (2.2)           | 905 (10.2)        |
| A(H1N1)pdm09 diagnosis (n=9,218) <sup>b</sup>                                              |                                    |                   |                   |
| Laboratory confirmed                                                                       | 7,946 (86.2)                       | 298 (91.7)        | 7,648 (86.0)      |
| Clinically diagnosed                                                                       | 1,272 (13.8)                       | 27 (8.3)          | 1,245 (14.0)      |
| Comorbidities§ <sup>b</sup>                                                                |                                    |                   |                   |
| Any comorbidity (n=9,066)                                                                  | 2,946 (32.0)                       | 165 (50.2)        | 2,781 (31.3)      |
| Asthma (n=6,304)                                                                           | 988 (10.7)                         | 27 (8.3)          | 961 (10.8)        |
| Other chronic lung disease (n=6,268)                                                       | 786 (8.5)                          | 47 (14.5)         | 739 (8.3)         |
| Heart disease (n= 5,676)                                                                   | 267 (2.9)                          | 24(7.4)           | 243 (2.7)         |
| Renal disease (n= 6,349)                                                                   | 112 (1.2)                          | 11 (3.4)          | 101(1.1)          |
| Liver disease (n= 4,025)                                                                   | 40 (0.4)                           | 3 (0.9)           | 37 (0.4)          |
| Cerebrovascular disease (n= 3,151)                                                         | 21 (0.2)                           | 2 (0.6)           | 19 (0.2)          |
| Neurological disease (n= 4,855)                                                            | 571 (6.2)                          | 61 (18.2)         | 510 (5.7)         |
| Diabetes (n= 7,468)                                                                        | 84 (0.9)                           | 8 (2.5)           | 76 (0.9)          |
| Immunosuppression (n= 8,256)                                                               | 430 (4.7)                          | 30 (9.2)          | 400 (4.5)         |
| Pandemic H1N1 vaccination (n= 1,538) <sup>b¶</sup>                                         | 157 (3.5)                          | 7 (4.1)           | 150 (3.1)         |
| Time from symptom onset to hospital admission, days, median (IQR) (n= 7570) <sup>b</sup>   | 2 (1 - 4)                          | 3 (1 - 5)         | 2 (1 - 4)         |
| Antiviral agents used                                                                      |                                    |                   |                   |
| No NAI treatment                                                                           | 3,540 (38.4)                       | 122 (37.54)       | 3,418 (38.4)      |
| Treated with any NAI                                                                       | 5,678 (61.6)                       | 203 (62.5)        | 5,475 (61.6)      |
| Treated with oral oseltamivir (n=5,678) <sup>bc</sup>                                      | 5,316 (93.6)                       | 188 (92.6)        | 5,128 (93.7)      |
| Treated with intravenous/inhaled zanamivir (n=5,678) <sup>bc</sup>                         | 78 (2)                             | 2 (1.0)           | 76 (1.4)          |
| Treated with intravenous peramivir (n=5,678) <sup>bc</sup>                                 | 22 (0.4)                           | 11 (5.4)          | 11 (0.2)          |
| Treated with NAI (regimen unknown) (n= 5,678) <sup>bc</sup>                                | 309 (5.4)                          | 13 (6.4)          | 296 (5.4)         |
| Treated with both NAI and Non-NAI (n=1,312) <sup>bc</sup>                                  | 31 (2.4)                           | 2 (2.9)           | 29 (2.3)          |
| Treated with NAI combination therapy (n= 5,678) <sup>bc</sup>                              | 47 (0.8)                           | 11 (5.4)          | 36 (0.7)          |
| Early NAI (≤2 days of symptom onset) (n= 3,899) <sup>bc</sup>                              | 2,155 (23.4)                       | 50 (15.4)         | 2,105 (23.7)      |
| Later NAI (>2 days after symptom onset) (n= 3,899) <sup>bc</sup>                           | 1,744 (18.9)                       | 67 (20.6)         | 1,677 (18.9)      |
| Time from symptom onset to antiviral treatment, days, median (IQR) (n= 3,629) <sup>b</sup> | 2 (1 - 4)                          | 3 (1 - 6)         | 2 (1 - 4)         |
| <b>Other in-hospital treatment<sup>b</sup></b>                                             |                                    |                   |                   |
| Antibiotics (n=6,381)                                                                      | 4,165 (45.2)                       | 119 (36.6)        | 4,046 (45.5)      |
| Corticosteroids (n= 3,052)                                                                 | 825 (9.0)                          | 69 (21.2)         | 756 (8.5)         |
| Hospital length of stay, days, median (IQR) (n=6,753) <sup>b</sup>                         | 4 (2 - 7)                          | 7 (2 - 14)        | 4 (2 - 7)         |
| <b>Other patient outcomes<sup>b</sup></b>                                                  |                                    |                   |                   |
| Influenza-related pneumonia¥ (n=5,532)                                                     | 1,851 (20.1)                       | 108 (33.2)        | 1,743 (19.6)      |
| Admission to critical care (n=7,632)                                                       | 1,725 (18.7)                       | 234 (72.0)        | 1,491 (16.8)      |

Table legend:

<sup>a</sup> All percentages have been calculated using these denominators unless otherwise specified

<sup>b</sup> Missing data present; 'n' indicates number of cases with data

<sup>c</sup> Percentages calculated as a proportion of the sample receiving NAI therapy

<sup>†</sup> Reported as clinically obese or using WHO definition for obesity (BMI ≥ 30 in adults aged ≥ 20 years)

‡ Proportions were calculated as a percentage of pregnant patients among female patients of reproductive age (13 to 54), n=580; the broader age range was selected in preference to the WHO definition (15-44 years) after consultation with data contributors to reflect the actual fertility experience of the sample.

§ For definition of comorbidity, see Supplementary appendix 3

¶ Denominators for pandemic vaccine based on patients admitted after October 1<sup>st</sup> 2009 (when vaccine potentially available): total: 4,989; deceased: 170; survived: 4,819

‡ Clinically or radiologically diagnosed pneumonia
